# Supplementary material
Source: publisher site journal article supplement (https://www.spandidos-publications.com/5369/downloadSupplementary)
Supplement: Supplementary file 1 [file downloadSupplementary]

## Sheet: table_S1
Table SI. Results of gene expression comparisons between CTR, CIN1 and CC groups obtained by unpaired t-test.
		CC vs. CIN				CC vs. CTR				CIN1 vs. CTR					Normalized expression of CC																															Normalized expression of CIN1
Illumina_probes	gene_name	log2FC	AveExpr	P.Value	adj.P.Val	log2FC	AveExpr	P.Value	adj.P.Val	log2FC	AveExpr	P.Value	adj.P.Val	cluster	CC006	CC032	CC034	CC016	CC028	CC021	CC036	CC027	CC004	CC011	CC003	CC022	CC031	CC005	CC025	CC020b	CC035	CC023	CC029	CC033	CC018	CC001	CC020	CC002	CC010	CC015	CC007	CC024	CC014	CC019	CC026	CIN103	CIN127	CIN119	CIN118
ILMN_1778444	FKBP5	2.3632	1089.17	1.30714e-23	1.39093e-19	2.20235	1432.41	1.07228e-22	7.60672e-19	-0.160847	468.61	0.288359	0.441166	1	2749.42	1627.88	2716.55	1873.48	2906.01	5006.44	1146.83	2585.98	2324.48	3275.84	1939.68	2328.6	2456.93	3283.12	1806.2	2789.47	2369.92	3086.27	1982.76	1879.11	2507.28	2154.76	982.048	1942.49	3520.03	2773.54	2705.86	483.314	2434.59	972.341	1076.21	345.903	335.434	463.352	452.214
ILMN_1772131	IL1R2	2.64471	2595.02	8.23737e-21	4.38269e-17	2.9256	2077.43	3.51476e-24	7.48012e-20	0.28089	432.654	0.140277	0.260367	1	1910.77	1822.7	3492.31	3779.37	2493.42	3707.69	1388.84	1755.41	4296.61	3868.3	2478.8	2864.47	3618.6	3892.49	4009.34	5500.47	3719.87	11569.1	3607.22	3374.11	2382.88	3456.66	1021.93	3316.32	6301.48	6809.84	4105.12	754.065	6060.81	1648.75	3324.02	389.352	365.282	363.189	308.817
ILMN_2345898	SLA	1.55814	2309.31	3.45041e-20	1.46863e-16	1.32078	2035.33	2.83374e-17	4.3077e-14	-0.237353	1097.58	0.0405896	0.0989891	1	2484.02	2557.48	3224.35	2644.9	2484.02	4325.9	2151.92	2395.53	2824.99	2507.28	3136.58	2900.28	4178.8	3474.05	2137.79	3026.55	2516.74	3844.15	2749.42	2649.16	2813.16	2315.64	2416.52	2716.55	3779.37	3566.66	2733.73	1745.97	2456.93	1549.64	2733.73	736.007	431.681	1054.13	1025.49
ILMN_1661599	DDIT4	1.6602	529.468	1.0631e-17	2.51388e-14	1.49123	613.909	3.52266e-16	3.74846e-13	-0.16897	285.054	0.217046	0.359805	1	1076.21	1024.59	593.739	772.259	1516.62	1022.82	1061.29	1359.58	1104.67	1182.64	1087.52	1064.76	872.179	654.351	1032.98	703.885	997.216	559.769	1097.8	716.68	1241.02	1113.06	1288.48	733.902	735.21	636.93	633.563	351.837	962.714	206.847	1024.59	281.796	267.037	364.421	257.786
ILMN_1667371	SLA	1.52375	1390.67	9.94759e-18	2.51388e-14	1.44158	2169.61	2.79411e-17	4.3077e-14	-0.0821778	1159.56	0.511089	0.653626	1	2695.3	3086.27	3316.32	2864.47	2705.86	4864.27	2465.45	2851.52	3233.29	3034.68	2971.57	2906.01	4538.65	4203.08	2580.96	3586.62	2591.91	4168.75	2894.71	2832.95	2864.47	2597.37	2352.61	2738.72	3972.41	3962.96	2638.87	1640.38	2618.55	1497.9	3215.99	806.09	492.501	1175.61	1108.37
ILMN_1800638	CUGBP2	1.20933	565.085	7.96179e-18	2.51388e-14	1.03904	696.519	2.05761e-15	1.62186e-12	-0.170291	449.161	0.0871471	0.180784	1	1151.61	835.95	789.198	958.262	855.6	1369.07	587.502	827.476	885.955	1316.76	716.68	796.312	1182.64	849.139	585.624	803.92	806.09	787.791	845.907	1033.63	902.689	788.715	907.903	1215.84	1314.03	1212.58	842.064	558.792	851.406	704.303	644.72	364.308	318.28	532.354	388.387
ILMN_1781700	IL18R1	2.37621	3030.87	2.41686e-17	4.28629e-14	2.21476	691.095	2.31584e-16	2.73809e-13	-0.161446	205.987	0.405185	0.558747	1	882.214	445.574	1302.37	768.963	543.232	1757.95	291.159	511.409	1582.01	1249.06	785.8	757.616	1319.36	1994.69	1698.15	1610.77	629.909	3121.83	1469.49	1005.17	603.42	690.76	349.161	914.758	1295.93	1939.68	2429.61	275.967	1568.26	498.583	687.935	153.258	NA	240.456	170.862
ILMN_1782050	CEBPD	1.40401	3719.39	2.49558e-16	2.79531e-13	1.38325	5249.92	9.93249e-17	1.24343e-13	-0.0207627	2888.8	0.866003	0.919445	1	7912.76	8480.39	9752.65	7379.72	7057.67	8389.6	6562.57	4799.64	6060.81	6712.27	7379.72	7379.72	8004.79	9814.47	5373.14	10452.3	7608	8294.12	7028.61	8993.62	8993.62	4178.8	5546.44	6903.83	9248.37	9515.23	8480.39	3350.16	5006.44	6116.53	8784.57	1839.48	1936.43	2511.55	2585.98
ILMN_1781285	DUSP1	1.83184	2576.1	4.56563e-16	4.62694e-13	1.86417	3447.33	3.91005e-17	5.54758e-14	0.0323308	1484.6	0.842433	0.904383	1	5078.38	5397.23	5193.06	5153.03	4670.85	7028.61	4641.1	4168.75	4267.94	6444.66	5834.44	5172.48	7233.87	6333.98	5153.03	8004.79	4948.47	5653	5632.95	4850.4	4168.75	3801.82	3107.88	3520.03	6138.45	6531.28	7308.47	2052.82	4574.27	1988.94	8126.54	1257.09	657.882	1405.18	1513.24
ILMN_1661695	IRAK3	1.48563	3214.74	4.956e-16	4.79425e-13	1.56004	430.123	1.02525e-17	2.51388e-14	0.0744019	196.643	0.571188	0.70384	1	506.291	542.458	742.549	638.846	548.107	919.555	318.513	466.228	595.607	685.224	373.868	495.926	625.268	760.278	574.383	869.762	456.24	1441.85	711.728	645.384	312.103	583.094	209.715	629.571	928.465	1626.12	688.26	344.6	689.026	584.002	433.497	168.315	153.819	167.101	236.197
ILMN_1913678		1.86164	1585.74	8.22831e-16	7.29645e-13	1.65733	824.234	3.03025e-14	1.53151e-11	-0.204311	345.838	0.224324	0.368595	1	1002.03	689.715	1186.96	844.893	825.853	1675.34	605.721	1143.62	1591.8	1710.93	646.381	942.977	1704.77	1648.75	1189	1141.45	929.921	3215.99	1551.63	1054.13	848.609	1118.57	481.947	881.157	1538.84	2478.8	1549.64	846.403	1438.62	906.556	900.672	167.154	150.455	332.935	448.013
ILMN_2376205	LTB	-1.04521	2898.63	8.14759e-16	7.29645e-13	-0.842449	3465.28	1.6526e-12	3.33354e-10	0.202759	4727.77	0.0332882	0.0839382	2	1939.68	3192.3	2287.14	1852.57	2291.43	2307.76	2670.57	1902.87	1965	2990.73	2217.78	2106.41	2473.89	2567.18	2813.16	2624.02	3158.72	1607.3	2203.32	3950.54	3005.87	2557.48	2382.88	1518.56	2382.88	1988.94	1576.2	3744.19	2259.79	2711.69	2918.51	5677.92	6769.17	4737.56	5481.39
ILMN_1721762	IL18RAP	1.93684	1418.37	1.24937e-15	1.06357e-12	1.81926	2406.82	4.42263e-15	3.2456e-12	-0.117584	913.316	0.504076	0.647537	1	3744.19	3107.88	3719.87	2399.49	3400.41	5653	1532.09	2789.47	5779.12	4592.78	2562.69	3107.88	2086.28	4466.14	5756.3	4466.14	2681.01	8169.58	4067.62	4641.1	1868.93	3756.02	1323.17	2659.6	4325.9	8046.34	4080.36	1693.77	3768.39	2207.14	3756.02	746.854	402.026	1196.55	729.205
ILMN_1689712	LOC440927	-1.0394	713.512	2.5835e-15	1.96364e-12	-0.826461	813.285	7.14949e-12	1.04216e-09	0.212934	1075.33	0.0285564	0.0742682	2	537.494	941.34	570.181	452.382	497.09	514.557	753.085	644.442	657.882	531.705	650.202	696.859	636.043	611.115	722.178	456.633	979.063	523.797	791.921	752.266	490.442	857.201	646.381	508.972	381.643	396.333	438.907	831.922	605.721	529.492	636.309	1090.24	1319.36	1125.34	1435.06
ILMN_1752526	RNF144B	1.11964	695.564	2.48606e-14	1.29438e-11	1.10725	388.139	9.12563e-15	5.5489e-12	-0.0123907	224.7	0.909296	0.946105	1	450.463	463.352	624.643	629.256	623.412	756.862	496.51	368.35	491.58	526.854	439.71	370.718	451.765	595.048	639.813	947.781	431.256	812.149	625.895	449.549	453.688	348.114	307.991	460.418	634.238	852.706	605.987	272.483	539.229	326.795	442.617	194.824	185.494	206.295	251.248
ILMN_1744347	LOC127295	-1.00488	631.523	3.0944e-14	1.53151e-11	-0.762399	658.628	2.60185e-10	1.79781e-08	0.242482	877.296	0.0151852	0.0444162	2	391.422	721.28	457.276	377.17	521.076	491.357	610.245	552.141	509.348	412.998	494.351	469.559	510.373	405.55	664.914	443.892	776.576	428.125	582.789	719.334	477.85	671.768	553.183	571.803	285.313	380.242	344.503	705.581	375.763	369.703	509.588	879.737	1152.6	1190.08	1091.19
ILMN_1765043	RPL38	-1.06264	2174.14	5.85021e-14	2.49008e-11	-0.875438	2082.43	2.67572e-11	2.93474e-09	0.187202	2794.78	0.0782903	0.166634	2	1627.88	2028.24	1038.68	1505	1797.16	1762.32	1734	1810.57	1808.6	1263.67	1476.17	1627.88	1045.62	1316.76	1968.3	1055.77	2037.02	1362.68	1808.6	1679.47	2092.74	2162.36	1433.69	1665.82	896.418	878.425	1098.61	2191.92	1184.72	1146.83	1689.81	3790.21	3881.28	3546.32	3881.28
ILMN_1746436	HCG27	1.5173	2464.57	7.4731e-14	3.10684e-11	1.37332	565.585	1.02626e-12	2.25808e-10	-0.143982	315.527	0.34257	0.498126	1	660.515	943.596	551.647	615.722	415.259	790.983	506.084	581.217	1011.65	1366.06	639.146	452.058	940.584	588.933	779.902	600.301	547.55	675.75	657.882	947.781	490.815	755.982	1136.42	990.072	1503.05	1382.98	1354.97	489.884	849.79	401.732	542.261	199.693	184.831	402.292	276.126
ILMN_2376204	LTB	-1.08925	2352.3	1.32268e-13	5.21281e-11	-0.94599	1057.77	8.18915e-12	1.14163e-09	0.14326	1464.04	0.195555	0.333611	2	584.839	1061.29	673.581	675.75	541.814	625.268	707.529	444.801	591.415	725.06	817.643	636.043	687.188	778.95	731.354	755.437	1024.59	513.318	639.813	1092.18	784.798	637.566	1017.67	615.722	725.409	828.39	389.352	1132.59	521.547	857.201	766.448	1530.42	2240.04	1656.68	1471.37
ILMN_2091412	FLT3LG	-1.1206	355.238	1.36163e-13	5.22232e-11	-0.998361	389.126	3.26969e-12	5.98798e-10	0.122238	560.561	0.282636	0.434594	2	236.393	319.812	188.089	227.305	299.253	226.756	346.18	257.972	207.367	259.834	216.22	251.618	224.031	181.491	310.279	197.751	379.706	170.989	245.408	312.567	332.935	277.595	530.628	211.764	227.033	238.779	194.099	400.035	200.683	228.37	236.313	605.424	889.251	730.074	498.968
ILMN_2214678	MXD1	1.4743	1674.58	1.63554e-13	6.00132e-11	1.30667	2542.85	4.69513e-12	7.80638e-10	-0.167631	1509.95	0.265025	0.414909	1	3392.13	3382.88	3350.16	3332.18	2170.74	3972.41	2199.36	2228.49	3940.43	3855.38	3248.77	3215.99	4325.9	3382.88	3026.55	3744.19	2319.59	4067.62	3224.35	3482.53	2937.86	2552.69	2806.58	3121.83	5309.41	6007.74	4067.62	2356.17	3275.84	2439.73	3005.87	1047.97	503.179	1764.65	1353.8
ILMN_1873034	TRA	-1.28558	1676.06	1.89955e-13	6.62725e-11	-1.19341	635.052	9.29415e-13	2.1736e-10	0.0921743	933.848	0.482781	0.629126	2	496.51	629.256	231.98	531.929	414.434	305.55	473.04	474.133	358.843	325.966	404.894	428.715	381.319	254.47	457.433	237.944	534.408	190.542	358.952	421.711	560.221	480.128	554.715	241.615	274.834	255	337.924	618.387	254.177	267.878	531.057	1446.9	1170.51	1199.89	1305.06
ILMN_1692742	DENND3	1.02734	3471.01	2.4191e-13	7.96945e-11	1.00652	728.843	1.37417e-13	5.22232e-11	-0.0208181	473.706	0.84348	0.905101	1	944.264	955.941	1084.72	963.548	676.097	1067.49	701.602	596.237	990.072	1119.39	810.651	718.659	1153.47	1042.04	792.762	1110.35	785.313	1029.65	780.486	1048.89	913.396	661.46	937.861	1272.28	1352.3	1453.17	1227.21	677.735	942.977	723.892	872.79	410.376	364.606	390.441	315.533
ILMN_1796316	MMP9	2.49425	4287.03	3.12327e-13	9.36189e-11	2.98447	2006.99	2.32736e-17	4.28629e-14	0.49022	453.437	0.0597133	0.134123	1	2088.88	1719.97	4480.53	2749.42	1589.94	4511.67	1614.47	1523.7	1411.33	3537.88	1542.49	1644.59	7421.89	3233.29	1315.52	4364.34	4255.49	16456.6	3248.77	6418.42	2224.37	1542.49	608.194	1205.59	4351.62	6116.53	4255.49	3048.33	2498.16	3950.54	3144.94	407.305	414.695	181.196	333.61
ILMN_1799106	MOSC1	1.40896	1706.64	3.59195e-13	1.06172e-10	1.45231	567.062	2.49363e-14	1.29438e-11	0.043356	293.85	0.766589	0.85189	1	539.685	682.393	1017.67	631.849	518.105	644.442	660.846	466.422	868.58	1058.65	748.201	910.302	1247.8	682.393	389.847	791.921	817.042	1405.18	838.664	1698.15	622.763	804.496	431.256	695.694	1186.96	1126.36	747.72	745.959	996.328	561.776	897.156	198.358	197.34	199.074	377.275
ILMN_1676765	LOC390354	-1.02457	994.51	6.31404e-13	1.62441e-10	-0.79555	823.324	1.28761e-09	6.28505e-08	0.229017	1123.83	0.0358767	0.0892979	2	537.685	833.688	564.845	483.683	547.55	521.332	725.06	751.878	621.585	596.237	557.329	720.913	543.499	532.777	845.907	418.448	751.477	455.899	869.173	746.417	639.146	785.8	587.502	477.044	391.198	411.162	498.968	874.616	664.914	446.214	588.341	1171.5	1370.69	1566.48	1430.62
ILMN_1688959	CD27	-1.02945	655.281	8.54401e-13	2.06629e-10	-1.0522	454.476	8.93144e-14	3.58639e-11	-0.0227501	631.971	0.83478	0.898285	2	191.943	481.458	175.346	326.412	219.167	264.004	328.295	233.349	246.529	296.411	318.656	302.084	252.75	243.876	254.376	222.616	329.614	186.699	281.304	355.956	421.837	349.624	610.831	290.638	233.468	239.127	184.988	368.156	229.188	239.245	313.235	747.334	829.837	765.043	663.591
ILMN_3302905	LOC729798	-1.07251	1264.9	8.67228e-13	2.07375e-10	-0.89638	962.951	1.60302e-10	1.21841e-08	0.176129	1282.75	0.123909	0.236931	2	661.46	953.084	578.788	533.485	859.423	690.123	860.119	795.85	697.562	602.078	763.257	699.766	678.041	658.567	842.064	556.592	1068.43	467.32	867.947	674.304	979.063	994.019	497.09	535.182	362.278	337.577	522.49	1054.85	596.491	569.395	758.923	1787.59	1462.85	1292.35	1822.7
ILMN_3211132	LOC645173	-1.01767	1041.84	9.67553e-13	2.19058e-10	-0.929818	1474.92	7.94792e-12	1.13018e-09	0.0878515	1968.08	0.417561	0.570418	2	800.407	1928.21	809.189	762.848	908.907	795.85	1177.61	1111.18	1405.18	1005.92	1076.21	986.159	877.152	771.183	1433.69	686.421	1057.68	774.582	1308.66	1127.31	1126.36	1505	1700.52	1028.84	603.74	783.498	676.097	1176.55	1060.44	888.634	934.325	2001.08	2140.91	2681.01	2456.93
ILMN_1750429	MKNK1	1.16878	1198.42	1.54533e-12	3.22429e-10	1.15052	726.952	7.50039e-13	1.83475e-10	-0.0182565	417.049	0.88456	0.931157	1	820.331	906.556	1282.35	696.087	777.965	1679.47	616.315	565.114	689.026	1016.78	715.624	714.754	789.198	1841.78	1162.66	1318.32	788.296	1827.48	1051.56	1301.18	629.571	595.894	505.724	857.776	1627.88	1734	1121.56	707.529	1250.24	803.473	731.354	351.253	335.784	466.603	409.283
ILMN_1781468	SMAP2	1.22038	1208.67	1.64902e-12	3.33354e-10	1.17308	1702.25	2.00489e-12	3.91451e-10	-0.047302	968.522	0.719183	0.817609	1	2612.81	2386.67	3628.73	1766.9	2535.82	3509.49	1959.85	2299.18	2444.86	2997.43	2272.42	2113.63	2365.21	4255.49	1997.78	3466.67	2728.27	2502.84	1433.69	1762.32	2369.92	1513.24	1477.63	1780.85	3034.68	3078.62	2407.8	929.174	1893.61	1394.43	2113.63	826.381	890.595	849.139	723.892
ILMN_1737561	LOC88523	1.14259	1072.75	1.9983e-12	3.91451e-10	0.828104	423.24	2.25782e-08	6.28939e-07	-0.314483	289.81	0.0121494	0.03698	1	491.173	492.821	440.298	380.329	324.61	630.606	278.184	401.051	679.514	693.012	433.638	458.201	504.669	535.886	612.014	448.786	355.857	769.461	555.591	658.567	346.263	391.786	524.598	790.169	660.202	823.109	675.42	294.125	674.694	502.595	405.971	180.674	142.053	380.329	276.355
ILMN_1798804	SRPK1	1.09583	580.391	3.41756e-12	6.01095e-10	1.14032	534.846	1.89085e-13	6.62725e-11	0.0444878	325.536	0.711822	0.812183	1	631.849	554.482	883.397	478.183	530.416	761.567	404.387	527.1	565.677	637.258	540.402	776.018	1047.97	813.045	829.365	676.728	684.136	1462.85	733.051	1025.49	491.767	573.881	355.317	579.396	842.697	1433.69	894.648	649.874	852.098	568.022	631.508	240.061	202.632	337.467	334.248
ILMN_3294222	LOC100132673	-1.03323	785.722	3.582e-12	6.19773e-10	-0.827713	585.676	1.96984e-09	8.84432e-08	0.205518	777.703	0.0732827	0.158127	2	296.795	782.936	351.349	322.863	330.778	314.601	427.477	525.239	652.573	454.932	413.998	382.272	361.068	382.174	492.348	336.571	448.637	332.849	501.233	507.923	451.386	643.497	608.536	386.01	278.712	351.957	341.439	506.451	418.84	349.511	444.053	921.103	756.862	919.555	889.251
ILMN_1685088	RPL36	-1.00478	1627.85	4.85112e-12	8.00322e-10	-0.8385	2191.67	7.22619e-10	4.02586e-08	0.166283	2944.83	0.138183	0.257334	2	1282.35	2602.84	1270.2	1191.31	2004.38	1669.55	1900.16	1959.85	1939.68	1430.62	1659.11	1474.87	1332.99	1105.59	2591.91	1118.57	2127.01	1291.07	1860.36	1965	2103.48	2259.79	2199.36	2120.45	942.172	1150.38	908.907	1959.85	1101.59	1062.05	1871.48	3928.26	3940.43	4267.94	3825.66
ILMN_2189222	KLHL8	1.08228	2479.6	5.16548e-12	8.39174e-10	1.04021	487.12	6.26582e-12	9.45739e-10	-0.0420636	306.189	0.726511	0.823104	1	719.786	766.875	535.886	460.418	537.685	1075.32	705.581	508.118	887.841	752.266	598.869	615.998	790.626	696.519	416.328	445.28	562.53	926.439	572.872	571.473	849.139	559.529	484.042	867.257	1164.76	956.749	503.801	371.778	510.795	294.125	433.883	252.928	284.829	257.298	249.519
ILMN_2081682	SMAP2	1.08993	3785.87	5.74382e-12	8.92262e-10	1.0892	7165.72	1.61507e-12	3.33354e-10	-0.000727945	4401.74	0.995216	0.997184	1	12119.3	9515.23	12027.5	7784.66	10832.1	13714	7122.96	8126.54	11340	11749.4	8732.21	8935.19	10759.6	13015.8	7826.82	12027.5	10137.8	12027.5	5879.24	6903.83	10379.1	8346.38	6562.57	9467.34	11569.1	13487.5	10322.8	3756.02	9091.56	6271.86	9312.74	5331.62	4815.54	3412.59	4915.97
ILMN_1755235	XPO6	1.09565	2338.27	5.92296e-12	9.13423e-10	1.18967	2868.19	3.85413e-14	1.74518e-11	0.0940138	1789.1	0.447546	0.598321	1	3500.38	4191.32	4670.85	3078.62	3200.4	4815.54	2429.61	2654.16	3466.67	5373.14	3392.13	3224.35	4574.27	5093.92	2716.55	5565.66	3299.93	4608.3	2858.32	4242.38	3291.71	2303.85	3707.69	4377.63	6116.53	8169.58	3275.84	2175.27	3350.16	2624.02	3438.75	NA	1508.11	1394.43	1451.28
ILMN_1741165	SLC11A1	1.43305	2187.54	6.58438e-12	9.79921e-10	1.63792	2906.01	7.6495e-15	4.93323e-12	0.204868	1412.81	0.203235	0.343465	1	2676.05	3576.14	6531.28	3566.66	3546.32	4118.99	2307.76	3070.95	2784.49	5251.58	2516.74	2925.54	4422.8	5756.3	2784.49	5879.24	3482.53	8935.19	3005.87	4882.44	2858.32	3656.36	1656.68	5546.44	6683.64	10759.6	5232.42	3283.12	3144.94	5309.41	3474.05	1110.35	1635.98	625.558	1257.09
ILMN_1712999	LOC642103	1.5656	488.671	7.45835e-12	1.07979e-09	1.673	481.614	2.50349e-13	7.96945e-11	0.107407	219.876	0.542413	0.68088	1	707.839	507.923	959.652	427.352	393.607	678.345	399.513	422.498	533.011	754.491	529.946	557.329	971.672	1050.68	708.931	656.56	709.747	1806.2	607.878	831.462	439.71	390.948	325.02	639.487	1075.32	1780.85	755.437	587.782	556.364	606.832	618.717	129.127	138.14	190.171	175.855
ILMN_1685824	B4GALT5	1.19559	726.195	8.261e-12	1.14163e-09	1.32773	905.029	3.43938e-14	1.6502e-11	0.132139	526.426	0.32731	0.482565	1	1359.58	1448.32	1710.93	797.397	877.152	1687.72	784.402	945.632	992.213	1483.01	1279.97	1122.51	1635.98	1564.35	970.951	1717.57	1387.2	2059.32	871.082	1626.12	924.888	1042.77	684.571	862.591	1595.58	1511.49	1477.63	726.695	1220.63	1119.39	1176.55	582.789	297.649	472.184	331.368
ILMN_1777344	RPS13	-1.07589	2042.62	8.17744e-12	1.14163e-09	-0.912964	2522.86	6.67774e-10	3.81007e-08	0.162925	3464.48	0.180519	0.314567	2	1448.32	2065.69	1743.48	1204.37	1644.59	1448.32	1976.55	2369.92	2291.43	1675.34	1752.77	1968.3	1469.49	1458.13	2800.59	1112.12	1956.85	1734	2507.28	2624.02	1813.32	2733.73	1345.07	1602.93	936.412	1063.98	1223.97	2773.54	1747.88	1157.66	1665.82	3341.6	3596.97	4864.27	5500.47
ILMN_2290118	MEGF9	1.12278	438.676	1.15219e-11	1.50435e-09	1.26094	401.569	3.4893e-14	1.6502e-11	0.138159	231.869	0.277434	0.428971	1	601.765	567.204	513.055	375.644	425.256	748.201	354.412	406.571	798.35	815.087	450.313	773.621	969.481	571.803	323.462	592.362	602.937	801.936	383.52	612.376	380.242	516.916	259.052	445.75	865.568	849.79	640.132	386.382	431.256	300.704	463.183	174.316	139.162	218.691	217.262
ILMN_1675939	IFNGR1	1.55333	1096.41	1.45679e-11	1.84545e-09	1.35662	1346.94	4.44877e-10	2.73638e-08	-0.19671	702.164	0.269563	0.420343	1	1382.98	2113.63	1299.91	1199.89	1601.32	2439.73	1156.59	1272.28	3063.71	2162.36	1458.13	1696.18	1706.64	2151.92	2576.32	979.063	1375.24	3744.19	2571.69	1968.3	1669.55	1986.35	1047.18	2526.9	2307.76	3707.69	1876.59	907.193	2348.45	961.96	1321.92	385.238	269.899	1023.78	872.179
ILMN_1653292	PFKFB4	0.95112	1769.07	1.54857e-11	1.93862e-09	1.22546	1315.44	9.42382e-17	1.24343e-13	0.274343	844.794	0.0133754	0.0399798	1	1675.34	1540.55	2224.37	1372.22	1359.58	2434.59	1298.37	1532.09	1681.64	2382.88	1646.21	1464.42	2399.49	2832.95	1328.74	2220.73	1747.88	1942.49	1315.52	2324.48	1469.49	1574.39	927.704	1549.64	2137.79	2175.27	2088.88	1282.35	1986.35	1487.86	1646.21	975.511	647.356	568.581	834.723
ILMN_1790689	CRISPLD2	1.40932	1641.55	1.59234e-11	1.98177e-09	1.70748	1161.02	1.69516e-15	1.38755e-12	0.298159	569.659	0.067522	0.148089	1	964.994	1017.67	1942.49	1638.36	1266.27	1768.91	1476.17	1162.66	1618.6	2733.73	1464.42	1509.7	2670.57	2018.29	1484.96	2295.22	2207.14	2259.79	1022.82	1736.48	2021.62	1234.17	817.042	1305.06	2521.18	2633.94	2092.74	1614.47	1441.85	1129.44	2456.93	705.581	399.381	280.26	462.506
ILMN_1784300	TUBA4A	1.10843	3934.2	1.87197e-11	2.22566e-09	1.24049	2072.26	4.12503e-14	1.82893e-11	0.132059	1142.71	0.307697	0.462361	1	2307.76	1588.01	3438.75	3392.13	2864.47	4392.24	1745.97	3844.15	2779.02	2452.2	1825.11	3576.14	3881.28	5213.62	1228.36	4574.27	2434.59	3686.52	2624.02	2224.37	2733.73	3100.98	1239.84	2701.12	3144.94	4130.75	3729.94	2220.73	3431.49	2103.48	3048.33	NA	1266.27	748.59	1148.11
ILMN_1700674	LOC728481	-1.00355	3485.1	2.34119e-11	2.65027e-09	-0.79512	1937.88	1.19973e-08	3.7695e-07	0.208425	2562.03	0.0756749	0.162187	2	1221.57	1790.1	1258.39	1159.61	1323.17	1108.37	1773.66	2069.65	1511.49	1402.2	1390.31	1520.33	1338.4	1247.8	1936.43	1145.86	1916.61	778.388	1945.58	1618.6	1696.18	2399.49	1131.67	941.34	971.672	638.846	1054.13	2065.69	1131.67	1043.67	1593.4	3529.39	2628.92	2287.14	3456.66
ILMN_2386530	RPLP1	-1.07559	1875.63	2.79742e-11	3.00681e-09	-0.796466	3087.79	8.17502e-08	1.7663e-06	0.279119	4145.42	0.0280046	0.0731731	2	1908.1	2800.59	1712.94	1656.68	2214.4	2411.84	2649.16	2328.6	2644.9	2291.43	2498.16	2399.49	2311.81	1797.16	3744.19	1508.11	3431.49	2052.82	3215.99	2789.47	2681.01	4042.88	1348.16	1599.46	1119.39	1061.29	1708.82	2966.32	2439.73	1624.37	2984.74	5039.96	5272.15	5309.41	6162.41
ILMN_1707810	RPS5	-1.09019	1617.94	2.93598e-11	3.09324e-09	-0.890306	1528.21	6.13774e-09	2.17706e-07	0.199888	2137.49	0.118404	0.228877	2	883.99	2162.36	844.893	653.428	994.019	966.519	1174.5	1253.65	1873.48	1016.03	1230.36	974.745	998.838	759.824	1801.54	612.711	1075.32	1042.04	1497.9	1287.29	1098.61	1422.47	1324.72	1268.64	641.821	1121.56	618.08	1338.4	1301.18	782.936	869.762	2228.49	3729.94	3686.52	2552.69
ILMN_1726289	C12orf35	1.17482	587.373	2.9767e-11	3.1063e-09	0.850583	597.847	1.48983e-07	2.8616e-06	-0.32424	416.092	0.0198864	0.055381	1	741.649	852.098	530.628	698.746	551.647	941.34	558.043	588.933	821.493	1023.78	711.728	1066.53	933.04	772.687	558.792	580.249	629.571	572.046	721.735	823.109	745.959	742.549	492.348	714.754	1054.85	929.174	717.119	617.801	639.487	415.906	749.383	255.057	156.547	480.515	444.488
ILMN_3244117	STMN3	-1.07064	1515.34	3.09168e-11	3.19404e-09	-1.08994	925.888	4.69041e-12	7.80638e-10	-0.019301	1312.98	0.877278	0.926332	2	694.812	977.636	384.755	506.451	810.103	431.405	713.076	834.723	558.535	822.539	544.216	598.231	515.846	434.674	540.156	285.313	722.974	391.306	492.669	769.855	977.636	610.245	927.031	512.633	620.305	350.363	374.341	818.763	538.096	418.552	608.837	1551.63	1724.63	1528.67	1557.08
ILMN_3220888	RPS6P1	-1.03557	810.327	3.58455e-11	3.58414e-09	-0.531877	504.339	0.000114582	0.000711772	0.503695	689.526	7.61643e-05	0.000504334	2	300.316	584.002	337.924	265.852	373.34	381.179	431.99	441.541	538.756	408.611	310.201	464.862	363.846	382.809	608.194	268.794	516.252	481.947	584.315	504.669	500.2	614.109	339.932	562.039	218.959	351.645	280.07	560.221	414.434	318.596	393.607	852.098	731.785	1106.6	1158.59
ILMN_3235013	LOC730288	-1.00895	827.76	5.96196e-11	5.37637e-09	-0.727029	414.54	2.69327e-07	4.60386e-06	0.281917	541.461	0.0208227	0.0575294	2	233.311	409.555	336.078	219.199	237.782	281.918	410.771	456.972	276.48	290.096	319.812	405.269	362.071	341.716	318.355	314.379	593.467	217.615	362.071	386.01	288.333	369.703	277.595	208.446	192.522	199.616	280.952	492.821	322.934	266.826	326.948	573.612	511.409	396.457	571.216
ILMN_1656791	RPS6	-1.042	1228.63	6.7334e-11	5.97085e-09	-0.717211	1820.74	8.25493e-07	1.149e-05	0.324789	2454.39	0.0104785	0.0327225	2	1222.71	1865.95	1077.92	701.966	1741.25	1219.33	1717.57	1644.59	2046.21	1535.64	1182.64	1506.43	973.108	1259.81	2473.89	866.731	1659.11	1456.57	2259.79	1584.02	1710.93	2092.74	1219.33	1785.41	760.278	1411.33	799.92	1560.57	1376.74	1044.71	1291.07	3093.99	2806.58	3940.43	4021.11
ILMN_2181241	LOC649946	-1.05569	471.391	8.33567e-11	7.03967e-09	-0.84994	456.377	2.11162e-08	5.94437e-07	0.205755	595.285	0.107479	0.212847	2	244.482	428.567	306.243	217.486	272.257	278.132	398.978	480.128	388.134	371.127	356.952	396.225	316.017	335.159	388.022	289.561	416.639	244.173	353.298	440.014	352.619	488.966	244.784	210.813	192.889	174.498	263.853	501.784	290.638	228.112	391.198	793.248	530.177	489.884	678.041
ILMN_1707312	NFIL3	0.985402	549.47	1.14539e-10	9.26854e-09	1.10571	462.222	4.86535e-13	1.31069e-10	0.120311	297.812	0.315557	0.470351	1	627.496	614.407	775.557	630.282	438.354	754.065	463.007	490.634	509.175	477.044	510.795	617.209	915.383	803.92	496.734	993.185	626.526	795.85	526.854	687.594	437.321	382.385	446.511	433.883	733.051	1006.7	650.202	436.346	517.335	530.876	586.653	299.405	195.552	241.235	333.859
ILMN_2337928	CXCR5	-1.01065	1174.7	1.25675e-10	1.0055e-08	-1.00184	381.663	5.26655e-11	4.88817e-09	0.00880181	526.573	0.942915	0.966704	2	310.864	302.549	246.625	238.371	232.981	264.449	210.419	234.293	210.615	281.548	443.422	241.918	256.178	176.753	262.277	205.969	280.513	162.816	197.561	334.497	337.924	277.531	470.102	258.429	303.003	199.588	166.921	326.948	269.899	203.342	216.125	691.116	776.018	409.7	997.216
ILMN_1717207	MMP25	1.30858	1748.36	1.30005e-10	1.03238e-08	1.51687	3152.13	1.53555e-13	5.73327e-11	0.208289	1696.87	0.193328	0.33122	1	3537.88	5590	6562.57	2762.01	2311.81	4608.3	2795.64	2421.11	3756.02	6683.64	2871.24	3040.64	6060.81	6963.26	3332.18	6060.81	3618.6	6995.95	3241.53	5927.49	3182.66	2894.71	2521.18	3834.38	7090.81	7379.72	6007.74	2721.46	5807.24	4278.62	3790.21	1724.63	1281.22	1093.08	1648.75
ILMN_2327860	MAL	-1.46427	848.463	1.79525e-10	1.32202e-08	-1.05182	1184.23	6.13247e-07	8.91853e-06	0.412451	1783.49	0.0240456	0.0646135	2	466.953	1041.22	429.444	727.521	551.425	749.809	1043.67	467.674	377.59	708.931	531.313	634.803	742.968	352.996	697.562	408.486	1001.25	287.191	727.91	1055.77	1191.31	553.967	766.448	349.424	485.152	325.097	542.261	1292.35	2311.81	1933.55	625.558	2103.48	2773.54	2133.91	2521.18
ILMN_3235148	FLJ43681	-1.17566	1057.3	1.96789e-10	1.41969e-08	-0.912054	1185.37	1.07168e-07	2.19303e-06	0.263606	1596.87	0.0716801	0.155298	2	610.245	1330.08	749.809	583.692	730.074	677.068	1020.17	1458.13	909.696	855.6	756.862	1002.03	668.317	855.6	1160.74	664.586	1186.96	580.755	1031.32	972.341	860.758	1293.49	619.971	543.99	480.328	409.555	566.968	1266.27	803.92	490.442	994.802	1965	1372.22	1829.73	1752.77
ILMN_1733998	DHRS9	1.41462	769.165	2.45495e-10	1.7074e-08	1.118	1072.06	7.9813e-08	1.72971e-06	-0.296618	634.018	0.0938926	0.19154	1	1717.57	1316.76	898.287	970.204	1152.6	2210.95	605.987	820.331	1521.85	2624.02	1255.99	1077.92	1747.88	1602.93	1096.08	696.519	1689.81	3248.77	1014.35	2571.69	1114.99	1227.21	1405.18	1634.19	1549.64	2012.22	1553.44	593.467	885.376	788.715	891.23	727.91	350.661	712.191	507.146
ILMN_1718982	BEST1	0.823646	800.015	2.70583e-10	1.83712e-08	1.022	327.806	2.27536e-14	1.27432e-11	0.198351	222.527	0.0557071	0.12699	1	344.314	377.848	613.805	453.015	380.242	382.272	376.809	362.785	536.294	539.024	326.319	289.098	484.042	533.011	300.828	505.915	350.858	512.633	323.726	632.199	332.084	340.899	247.876	575.182	684.571	502.985	629.571	314.847	480.328	269.635	406.434	232.492	182.485	221.053	218.662
ILMN_1748124	TSC22D3	1.09488	2538.95	2.71053e-10	1.83712e-08	0.939926	4551.25	6.96603e-09	2.39115e-07	-0.154949	3028.07	0.263069	0.412476	1	6656.77	7747.77	4783.79	4574.27	6216.63	9091.56	4799.64	5565.66	7122.96	7192.01	7233.87	5116.36	6531.28	5292.89	5397.23	6363.83	6394.54	4657.19	4686.78	4592.78	8294.12	4864.27	5807.24	4702.25	5807.24	4702.25	6627.7	2187.48	4670.85	3686.52	7572.74	NA	1979.46	3492.31	2659.6
ILMN_1674394	C20orf3	1.01541	683.386	2.82774e-10	1.88652e-08	1.0295	970.838	5.66585e-11	5.15275e-09	0.0140872	568.486	0.911387	0.947358	1	1318.32	1287.29	1827.48	798.879	988.259	1342.11	684.571	1026.28	1321.92	1388.84	969.481	871.082	2018.29	1691.86	849.79	1311.39	1183.62	3063.71	1258.39	2507.28	987.584	1141.45	614.407	913.396	1646.21	2287.14	1190.08	1291.07	1593.4	772.259	1330.08	579.396	467.674	510.98	479.748
ILMN_1684585	ACSL1	1.5174	2258.66	2.81241e-10	1.88652e-08	1.7546	2177.12	4.35651e-13	1.2362e-10	0.237201	1047.55	0.211896	0.353442	1	2773.54	2562.69	4143.22	2378.3	2244.55	4191.32	2263.68	2813.16	2535.82	4178.8	2356.17	3482.53	5193.06	4737.56	2851.52	4130.75	4178.8	5523.53	2597.37	4105.12	1968.3	2299.18	855.01	1622.78	3707.69	3576.14	4554.5	2421.11	3628.73	1582.01	3365.05	633.889	348.99	716.68	1061.29
ILMN_2051519	RPL37A	-1.0741	1524.36	3.38466e-10	2.16313e-08	-0.93205	2306.25	8.62779e-09	2.84236e-07	0.142054	3044.17	0.293001	0.445939	2	1217.02	2263.68	1673.65	1299.91	1922.4	892.987	2195.39	2721.46	1815.47	1506.43	1787.59	1956.85	1604.99	1640.38	1876.59	1152.6	2473.89	1169.22	2360.53	2295.22	1836.98	2267.44	1149.28	1449.97	844.362	887.147	1069.27	2633.94	1551.63	1191.31	1968.3	3892.49	3151.62	3164.91	4966.83
ILMN_1651228	RPS28	-1.02602	2285.81	3.77461e-10	2.37666e-08	-0.741538	3485.95	8.87102e-07	1.21968e-05	0.284486	4461.78	0.0297564	0.0767049	2	1785.41	3466.67	2685.81	1599.46	2267.44	2224.37	3566.66	4080.36	2960.39	3365.05	2287.14	3128.69	3086.27	2130.29	3224.35	2263.68	3913.97	1638.36	3182.66	3492.31	2567.18	3677.14	2248.28	1397.13	1578.08	1236.39	1910.77	4105.12	2552.69	1509.7	3950.54	4850.4	3913.97	3192.3	4948.47
ILMN_1736190	CYP4F3	1.24949	970.791	4.60559e-10	2.78455e-08	1.4304	532.547	1.17701e-12	2.50491e-10	0.180906	304.693	0.254495	0.402332	1	598.549	860.119	509.808	740.312	415.78	838.196	532.148	511.592	504.233	838.664	445.75	867.257	1965	770.291	353.082	575.453	869.762	994.019	743.883	803.041	763.257	585.624	477.27	607.878	1272.28	648.003	1015.06	790.626	1015.06	259.929	797.888	201.572	202.556	259.257	287.438
ILMN_2376403	TSC22D3	1.22642	2738.5	5.29962e-10	3.14168e-08	1.04842	2246.69	1.40642e-08	4.27086e-07	-0.178005	1422.83	0.261039	0.410268	1	3677.14	3790.21	2591.91	2395.53	3114.94	4898.34	2473.89	2900.28	3456.66	4438.09	3647.32	2685.81	3192.3	2502.84	3233.29	3474.05	2918.51	2049.53	2403.09	2340.47	4021.11	2099.94	2324.48	1801.54	2795.64	2255.85	3267.17	1043.67	2407.8	1962.56	4191.32	NA	853.808	1797.16	1287.29
ILMN_2392569	FPR2	1.00441	1569.87	5.88139e-10	3.44815e-08	1.10376	442.786	7.96571e-12	1.13018e-09	0.0993515	284.285	0.436391	0.587803	1	509.971	663.591	727.091	513.713	467.674	629.909	472.392	394.674	378.528	607.878	668.647	670.748	777.063	761.567	544.485	810.651	549.317	869.173	464.363	826.959	393.722	294.776	267.359	466.422	872.79	771.721	693.364	441.389	413.998	432.151	576.818	213.358	158.041	347.038	321.231
ILMN_1803811	TRIB1	0.966488	617.88	6.0144e-10	3.51644e-08	1.1217	449.511	6.33837e-13	1.62441e-10	0.155215	278.852	0.215858	0.358226	1	604.058	517.897	895.222	904.696	515.438	736.438	493.752	411.046	447.556	458.879	461.494	663.591	967.915	955.941	325.898	860.758	434.211	913.396	474.828	499.976	460.565	440.298	232.859	467.674	982.048	916.05	739.514	424.248	449.549	441.216	603.181	NA	193.663	234.293	289.098
ILMN_1681301	AIM2	1.02936	1234.42	6.49522e-10	3.73598e-08	1.04127	305.494	1.4746e-10	1.13346e-08	0.0119103	197.851	0.927946	0.957691	1	256.073	213.719	462.014	352.231	265.275	537.904	205.787	256.832	205.236	384.638	294.91	463.007	338.662	456.452	715.146	362.979	300.125	524.228	462.317	487.59	214.838	494.886	273.959	520.342	515.438	667.655	749.809	272.364	395.665	490.285	241.081	170.618	182.105	173.222	169.658
ILMN_1703074	CPD	1.11874	763.506	7.0045e-10	3.95411e-08	1.19017	401.069	2.86563e-11	3.04932e-09	0.0714271	230.695	0.618889	0.742834	1	361.169	541.814	480.328	421.837	453.688	811.162	361.169	442.297	668.647	675.018	412.998	741.191	816.115	604.592	391.786	394.319	519.699	979.063	479.21	546.62	406.943	432.78	202.333	437.896	999.721	1271.3	632.613	379.188	580.249	204.222	416.477	177.107	132.793	223.371	298.779
ILMN_1740875	FPR2	1.1909	2003.45	9.87418e-10	5.11295e-08	1.19304	1082.03	3.14729e-10	2.04834e-08	0.00213978	652.673	0.988945	0.993239	1	1168.08	1656.68	1766.9	1284.97	1048.89	1673.65	1003.65	972.341	879.737	1558.78	1712.94	1773.66	1945.58	1884.61	1289.65	1997.78	1200.88	2001.08	1295.93	1916.61	1032.12	679.128	743.883	1456.57	2291.43	2113.63	1483.01	1025.49	1075.32	955.941	1492.59	426.669	312.567	820.964	646.759
ILMN_3225591	RPL14L	-0.90214	1415.08	1.02169e-09	5.18941e-08	-1.03506	1910.16	2.85323e-12	5.39475e-10	-0.132915	2484.97	0.258259	0.40683	2	1125.34	2336.74	982.87	1060.44	1104.67	1025.49	1262.48	1486.55	2031.06	937.066	1508.11	1114.04	1078.98	1016.03	1546.22	807.615	1487.86	879.163	1449.97	1387.2	1778.42	1345.07	2207.14	2203.32	839.814	1070.21	680.579	1582.01	1012.56	1131.67	1127.31	2356.17	2511.55	3576.14	3299.93
ILMN_1656287	SPOCK2	-1.06726	1883.86	1.58434e-09	7.41053e-08	-1.01062	1661.39	2.89191e-09	1.20442e-07	0.0566376	2308.02	0.687134	0.794149	2	1489.31	1458.13	661.46	900.672	1764.65	1016.78	1339.79	1271.3	998.838	1808.6	1097.8	1175.61	1103.63	994.019	908.907	801.406	1530.42	428.418	824.238	943.596	2360.53	900.074	1582.01	683.123	1277.15	665.271	546.889	1620.78	840.356	670.374	1667.76	3182.66	3158.72	2456.93	2315.64
ILMN_2320888	CXCR4	0.920078	963.545	1.58842e-09	7.41332e-08	1.00265	763.21	3.13227e-11	3.20486e-09	0.0825676	532.459	0.496262	0.641024	1	851.406	1235.39	706.343	882.214	1127.31	1696.18	920.485	939.975	1010	1331.47	986.159	1021.01	1132.59	881.157	769.461	829.365	1281.22	785.8	1059.59	932.5	1335.73	673.967	1335.73	799.329	1234.17	910.916	749.383	623.727	887.841	464.862	1199.89	431.133	372.594	769.855	834.218
ILMN_1909770		0.858216	578.233	2.03947e-09	9.04249e-08	1.03186	343.476	1.13745e-12	2.44758e-10	0.173648	234.237	0.130264	0.246141	1	426.124	348.605	584.002	470.981	355.956	540.402	342.509	342.911	215.908	519.487	300.125	328.136	414.971	573.386	372.392	604.058	454.344	784.798	324.121	325.747	341.716	373.868	356.663	383.16	701.602	584.839	661.806	259.458	567.204	806.09	369.608	203.025	190.03	180.947	222.863
ILMN_1672834	SSH2	0.829368	1281.49	2.06622e-09	9.12308e-08	1.04077	1563.65	2.13186e-13	7.31778e-11	0.211397	1049.17	0.0577341	0.130643	1	1750.07	1979.46	2705.86	1612.83	1973.83	3070.95	1588.01	1780.85	1722.32	2557.48	1734	1836.98	2469.68	2937.86	1799.33	2744.54	2082.61	2612.81	1560.57	1948.84	2140.91	1582.01	976.126	1886.92	3055.37	2990.73	2123.84	1391.62	1910.77	1445.23	1618.6	1159.61	952.329	758.072	924.888
ILMN_1693014	CEBPB	0.799348	3673.78	3.18435e-09	1.30179e-07	1.07288	6089.16	2.39297e-14	1.29438e-11	0.273537	3996.9	0.0127312	0.0384047	1	7028.61	6656.77	10585.8	6963.26	9575.23	9427.32	7308.47	6769.17	5309.41	8004.79	6162.41	7747.77	11127.8	11569.1	6531.28	11048.2	9885.31	10191.8	6418.42	9515.23	8004.79	5463.1	3801.82	5213.62	10832.1	11500.5	9635.41	5729.05	6932.28	7342.54	8993.62	4524.18	3026.55	3275.84	4815.54
ILMN_1661917	LOC644039	-1.01467	5318.53	3.2834e-09	1.33609e-07	-0.833776	5772.6	2.38078e-07	4.1429e-06	0.180895	7656.45	0.188791	0.32549	2	3018.17	5927.49	3100.98	2299.18	4031.91	3078.62	4080.36	6191.67	6090.96	5756.3	4203.08	4538.65	4278.62	3307.55	6060.81	2416.52	4511.67	3018.17	5463.1	5350.31	4783.79	7342.54	3697.01	2997.43	2183.44	2356.17	2858.32	5614.4	5292.89	2210.95	5133.33	10832.1	9189.76	9312.74	9515.23
ILMN_1659544	STX3	0.987729	594.129	3.298e-09	1.33946e-07	1.0634	574.001	1.09844e-10	8.92251e-09	0.0756723	387.364	0.570687	0.703467	1	717.89	791.921	713.518	577.696	530.876	869.173	502.18	455.613	744.748	867.947	664.914	653.123	925.664	947.106	631.849	653.428	654.688	1138.5	695.694	1037.14	582.519	518.105	585.624	812.149	1040.29	1261.13	833.238	535.182	694.812	548.62	654.053	297.458	252.889	395.307	404.637
ILMN_1731224	PARP9	1.30511	849.071	3.55532e-09	1.41428e-07	0.851716	802.66	2.56612e-05	0.000200118	-0.453391	582.957	0.0117851	0.0360619	3	1077.92	832.697	734.387	1183.62	748.201	907.903	609.678	483.505	559.324	903.339	1696.18	750.229	769.461	812.149	1227.21	1040.29	712.191	895.753	891.23	1089.19	624.033	874.001	2130.29	1288.48	895.222	1179.85	1593.4	615.722	812.601	844.362	586.378	346.18	271.488	537.245	463.973
ILMN_1695157	CA4	1.39442	1345.26	4.52914e-09	1.71911e-07	1.64825	745.049	6.01587e-12	9.21078e-10	0.253829	336.602	0.184519	0.319627	1	597.952	1197.55	1477.63	885.376	556.84	1027.02	699.068	412.01	771.183	768.452	710.086	900.672	1343.54	1738.88	694.812	1258.39	1128.3	3586.62	1235.39	1817.74	816.592	827.476	753.596	777.473	1140.24	2103.48	1428.96	782.936	1141.45	1511.49	1083.73	312.103	206.176	197.834	190.364
ILMN_1760347	SRGN	1.23393	4079.35	6.08889e-09	2.1679e-07	1.24285	7503.07	1.7945e-09	8.19474e-08	0.0089285	4570.99	0.958143	0.975329	1	9248.37	11127.8	7826.82	6903.83	9037.58	12425	5590	6683.64	14289.1	9946.66	8879.31	9635.41	9695.62	11832.3	11832.3	5006.44	6138.45	18166.7	12886.3	10452.3	9144.95	8732.21	9366.57	15194.2	12668.2	19249.4	8004.79	5857.48	11340	8993.62	6932.28	3492.31	3474.05	5614.4	3173.13
ILMN_1713058	PSTPIP2	0.939886	2647.92	6.67505e-09	2.31959e-07	1.09313	495.507	1.76601e-11	2.14767e-09	0.153243	300.634	0.240412	0.386819	1	781.964	502.985	719.786	510.373	644.442	701.602	467.525	510.589	510.795	721.28	447.556	588.341	694.445	706.343	720.518	895.222	657.252	1198.72	731.354	992.213	599.164	748.59	278.243	541.814	671.768	892.37	1362.68	604.592	727.91	397.878	431.99	367.94	224.439	269.899	283.027
ILMN_1737314	BCL6	1.24611	1225.11	8.34437e-09	2.76182e-07	1.35325	2065.89	2.39794e-10	1.68315e-08	0.107142	1114.36	0.537849	0.676788	1	2429.61	2894.71	2733.73	1431.95	2028.24	3456.66	1259.81	1418.1	2344.34	2851.52	1896.98	2207.14	3500.38	3962.96	3466.67	3257.45	2069.65	7379.72	2547.65	4118.99	1299.91	2864.47	1436.83	2344.34	3677.14	7342.54	3950.54	2130.29	3034.68	2488.68	1886.92	758.072	516.252	1012.56	1231.4
ILMN_1715068	AQP9	1.1791	3019.19	8.58644e-09	2.83752e-07	1.31359	4853.83	1.06566e-10	8.7565e-09	0.134484	2818.99	0.414671	0.567599	1	6034.16	6562.57	9091.56	3790.21	4719.02	9467.34	3628.73	4203.08	6503.21	5614.4	5927.49	7122.96	7699.92	9695.62	6683.64	8169.58	6060.81	11127.8	5653	7784.66	4833.62	5331.62	3005.87	5331.62	7784.66	13361.9	7869.56	4278.62	7233.87	4931.8	6246.88	1925.57	1130.53	2082.61	3382.88
ILMN_2205963	C10orf54	0.874856	1833.65	9.98442e-09	3.23422e-07	1.18887	2639.29	7.59118e-14	3.10684e-11	0.314017	1648.87	0.0120661	0.0367736	1	3158.72	2952.71	5331.62	2429.61	3756.02	5417.69	2889.37	2664.87	3128.69	5309.41	2690.04	2571.69	4799.64	6216.63	2521.18	4985.64	3566.66	4438.09	2744.54	4056.51	3509.49	3224.35	1394.43	2158.52	4231.34	4156.34	4480.53	2434.59	4377.63	2507.28	4554.5	2037.02	1629.68	1458.13	1933.55
ILMN_1675756	KCNJ15	1.03693	857.725	1.25529e-08	3.89432e-07	1.18172	409.185	7.84363e-11	6.7857e-09	0.14479	249.329	0.325011	0.480273	1	494.351	489.15	970.951	486.279	291.656	582.789	321.396	239.208	472.547	577.932	602.381	677.068	863.785	784.402	490.634	551.425	421.404	984.463	685.654	706.725	441.705	477.044	302.491	472.184	535.886	874.001	620.305	358.452	468.492	385.864	577.696	206.059	150.839	196.624	182.898
ILMN_2254635	ITGAX	0.989257	1077.5	1.31579e-08	4.05834e-07	1.02754	1729.14	1.62371e-09	7.56144e-08	0.0382816	1139.75	0.784832	0.864221	1	1745.97	2382.88	2272.42	2069.65	1501.27	2255.85	1295.93	1398.81	2240.04	2705.86	1930.68	1614.47	1988.94	3136.58	1702.23	2541.95	1474.87	2889.37	1568.26	2086.28	1871.48	1547.86	2224.37	3233.29	4407.81	6162.41	2079.59	1359.58	2295.22	2552.69	1825.11	904.696	1162.66	1163.77	710.91
ILMN_3267017	LOC100129028	-1.1687	871.086	1.38959e-08	4.24295e-07	-0.63127	1019.21	0.000711979	0.00335898	0.537429	1376.66	0.00166991	0.00702075	2	405.022	874.001	639.487	524.804	523.156	664.914	997.976	1157.66	938.511	973.926	684.92	1177.61	1021.01	673.581	916.05	668.977	1413	721.28	1077.08	1131.67	655.619	1125.34	470.458	430.03	420.833	374.665	710.086	1288.48	795.353	499.568	993.185	1948.84	1291.07	959.652	1956.85
ILMN_2197365	RGS2	1.27757	3609.69	1.53086e-08	4.56298e-07	1.10876	4776.87	2.36026e-07	4.12069e-06	-0.168811	3029.1	0.354977	0.510886	1	5756.3	5614.4	6683.64	5039.96	5834.44	6444.66	3357.74	5331.62	8784.57	7454.27	5350.31	6903.83	8677.74	10191.8	4985.64	6116.53	6162.41	9999.8	3913.97	5546.44	5438.37	6271.86	2311.81	6116.53	7493.65	7747.77	5927.49	4574.27	4452.61	3913.97	5807.24	1871.48	824.238	2744.54	2576.32
ILMN_1780334	KCNJ2	1.10598	2021	1.56146e-08	4.63417e-07	1.14578	582.8	2.11891e-09	9.33638e-08	0.039802	366.38	0.800777	0.875288	1	605.721	1063.98	594.801	455.899	613.551	1362.68	655.265	384.165	589.194	859.423	643.187	692.268	820.331	808.594	995.59	678.041	700.114	789.198	1034.51	835.95	630.961	668.647	902.052	1416.25	979.063	1312.81	828.39	421.258	860.758	367.63	543.754	259.158	171.545	400.655	506.666
ILMN_1773154	NFKBIA	0.890886	1736.49	2.40772e-08	6.60632e-07	1.19469	2892.93	4.78766e-13	1.30629e-10	0.303808	1855.16	0.0205611	0.0569249	1	3834.38	4377.63	4592.78	5953.46	3950.54	6903.83	4130.75	3374.11	2755.09	4231.34	3482.53	3291.71	6246.88	3596.97	3729.94	9144.95	5116.36	2644.9	3283.12	5078.38	5006.44	3215.99	1681.64	2244.55	3825.66	2695.3	3241.53	1997.78	2055.95	1893.61	5653	1727.04	2521.18	1474.87	1976.55
ILMN_1653871	NAMPT	1.41807	1956.55	2.61753e-08	7.08732e-07	1.48447	2223.61	2.74706e-09	1.15085e-07	0.0663997	1204.73	0.747405	0.838629	1	3576.14	3994.7	3448.15	1902.87	2365.21	3628.73	1578.08	1652.71	2889.37	2628.92	2612.81	3350.16	3474.05	4898.34	3291.71	2644.9	2676.05	5292.89	3576.14	3566.66	2259.79	1618.6	1722.32	2755.09	4608.3	7090.81	2175.27	1857.68	3192.3	3382.88	2628.92	666.654	345.165	1311.39	1311.39
ILMN_1679268	PELI1	1.03136	949.393	2.98608e-08	7.85906e-07	1.01281	485.828	2.6467e-08	7.14811e-07	-0.018552	309.756	0.899953	0.940476	1	726.695	680.198	545.897	493.573	651.639	969.481	535.182	440.298	567.204	811.162	666.339	709.747	911.641	883.99	537.494	658.567	644.111	822.018	621.585	687.935	580.981	449.405	369.394	438.206	949.205	803.041	737.835	353.082	607.33	243.78	636.602	186.381	NA	348.705	374.198
ILMN_1665877	RNF149	1.00197	3412.93	3.16685e-08	8.2493e-07	0.981533	4833.88	2.19175e-08	6.14555e-07	-0.0204331	3170.39	0.889215	0.933801	1	6060.81	5807.24	8294.12	4080.36	5677.92	8879.31	4311.8	4574.27	5039.96	6739.48	5251.58	8205.41	6769.17	9037.58	5879.24	6809.84	4931.8	9312.74	5417.69	6872.26	4815.54	4799.64	2889.37	4466.14	8480.39	9144.95	7493.65	4267.94	7028.61	4021.11	6963.26	2352.61	1189	2762.01	3814.23
ILMN_1678170	MME	1.26623	1990.96	3.91898e-08	9.82231e-07	1.3818	1121.98	1.2452e-09	6.10609e-08	0.115571	585.987	0.536747	0.67604	1	1533.91	1679.47	1553.44	1408.26	1402.2	2127.01	983.673	1170.51	1414.57	2541.95	1612.83	2340.47	2461.42	2263.68	783.983	1801.54	1646.21	1580.14	1088.41	1925.57	1528.67	1206.7	478.183	1007.53	2088.88	1913.74	2547.65	1109.4	1597.73	550.491	1827.48	516.252	252.976	349.161	632.613
ILMN_1743078	LOC643031	-1.32086	1357.13	6.1259e-08	1.42017e-06	-0.532745	1540.99	0.015069	0.0441126	0.788114	2213.39	0.000143058	0.000861757	2	1681.64	2024.92	1948.84	948.507	2448.62	780.948	2395.53	2352.61	929.174	568.867	826.381	1551.63	1916.61	1391.62	1841.78	1433.69	2429.61	928.465	825.309	822.539	1337.01	479.588	1007.53	858.335	812.149	601.13	626.865	1942.49	700.827	1656.68	2307.76	2633.94	4311.8	2031.06	2082.61
ILMN_1736863	TMEM140	1.00023	1719.29	6.62726e-08	1.49884e-06	0.865937	1465.27	8.81345e-07	1.21482e-05	-0.134296	1055.55	0.373846	0.529072	3	1206.7	1474.87	2166.6	2541.95	1624.37	2336.74	1132.59	1048.89	1303.68	1547.86	2425.49	1484.96	1801.54	1736.48	1942.49	2871.24	1449.97	1490.92	1430.62	1476.17	1546.22	1698.15	2633.94	2681.01	1700.52	1490.92	2252.72	1039.52	1436.83	1844.45	2365.21	1133.52	506.451	830.37	1085.65
ILMN_1669523	FOS	1.0206	1118.01	7.85591e-08	1.70776e-06	1.07643	653.615	7.54481e-09	2.5609e-07	0.0558312	408.379	0.718387	0.81712	1	836.491	1093.08	891.23	809.189	670.032	1331.47	756.862	556.84	618.08	1026.28	1015.06	845.907	1558.78	1002.96	654.053	1002.96	936.412	821.493	786.731	967.226	867.257	481.773	403.637	424.499	1009.02	843.744	1152.6	476.689	581.217	465.883	2072.93	316.273	270.65	385.124	393.495
ILMN_3306730	RBM47	1.01531	666.176	8.69865e-08	1.85003e-06	0.941639	700.798	2.3556e-07	4.11592e-06	-0.073667	473.753	0.633915	0.753688	1	949.205	1268.64	953.807	488.542	614.747	1179.85	582.789	624.643	802.503	897.156	703.482	1116.91	1277.15	911.641	766.01	939.197	736.007	1128.3	900.074	1002.03	693.364	518.906	582.272	746.854	1414.57	1497.9	939.975	626.526	791.921	664.914	758.072	240.764	181.406	482.727	501.967
ILMN_1810420	DYSF	1.18544	2724.46	9.03436e-08	1.90554e-06	1.34073	2380.37	1.13322e-09	5.68803e-08	0.15529	1276.68	0.391337	0.545743	1	2552.69	2507.28	5953.46	2733.73	2356.17	3107.88	2175.27	1841.78	1902.87	2773.54	2900.28	2502.84	4191.32	4670.85	2287.14	4657.19	3607.22	6739.48	2210.95	4719.02	2484.02	1817.74	2028.24	3275.84	4392.24	9091.56	3913.97	2932.3	2378.3	4325.9	2795.64	891.783	1192.35	637.258	591.166
ILMN_1797875	ALOX5AP	0.822534	3928.34	9.79926e-08	2.03538e-06	1.06706	6342.71	1.30662e-11	1.68531e-09	0.244521	4135.46	0.054636	0.125096	1	8169.58	6739.48	10322.8	8389.6	7608	12781.2	5879.24	7784.66	7308.47	8433.75	7572.74	9144.95	13126.6	11500.5	5953.46	9189.76	10832.1	13361.9	7057.67	13015.8	7869.56	7192.01	2654.16	3892.49	8389.6	9635.41	8389.6	6683.64	8126.54	5116.36	10452.3	4931.8	3814.23	4799.64	4767.03
ILMN_1844464		-1.05025	1658.73	1.17686e-07	2.37096e-06	-1.06913	2993.98	3.10252e-08	8.10733e-07	-0.0188808	4097.74	0.907144	0.944525	2	2187.48	2779.02	1086.69	2158.52	2676.05	1138.5	2240.04	3576.14	2263.68	2889.37	2028.24	2272.42	2207.14	1418.1	2498.16	881.157	2336.74	704.778	1868.93	1973.83	3438.75	3114.94	2109.85	1492.59	1599.46	1125.34	938.511	2332.47	1785.41	715.624	3100.98	6216.63	5417.69	4377.63	4753.84
ILMN_1807529	PADI4	1.01156	2252.9	1.20287e-07	2.41049e-06	1.35512	2206.14	5.47471e-12	8.70454e-10	0.343566	1268.6	0.0299463	0.0771104	1	2654.16	2255.85	4056.51	3607.22	2324.48	2456.93	2832.95	2488.68	3307.55	2695.3	2052.82	2971.57	5546.44	2531.4	2148.26	3224.35	4217.84	4915.97	2832.95	5807.24	3382.88	2395.53	1210.19	2272.42	4191.32	3456.66	2832.95	3456.66	2444.86	2024.92	5172.48	1270.2	1562.42	566.968	1062.05
ILMN_2323172	CSF3R	1.26648	1225.35	1.53735e-07	2.94225e-06	1.03861	1205.71	5.33912e-06	5.31465e-05	-0.227864	746.284	0.250085	0.397874	1	1286.26	2183.44	2099.94	1306.35	913.396	1217.02	930.579	779.902	1518.56	1685.61	1496.06	1069.27	1245.53	1599.46	1501.27	1514.97	1157.66	1994.69	1111.18	1764.65	1097.8	747.72	2315.64	2461.42	2618.55	3756.02	1359.58	862.591	1326.04	2287.14	1345.07	256.786	442.002	768.452	246.891
ILMN_1741727	QPCT	1.0715	1706.83	1.65774e-07	3.13044e-06	1.36481	1377.78	5.29405e-11	4.88817e-09	0.293312	747.063	0.0826335	0.173766	1	1438.62	2034.18	2918.51	1608.87	1508.11	2344.34	1391.62	1438.62	1436.83	1817.74	1358.46	1663.4	3686.52	2144.55	1456.57	2203.32	2099.94	3144.94	2248.28	4191.32	1308.66	1328.74	497.816	1175.61	2162.36	3529.39	1902.87	1836.98	2001.08	1054.13	2356.17	526.43	401.905	683.123	881.157
ILMN_2117623	PLXNC1	0.761958	2245.53	2.62432e-07	4.5041e-06	1.06759	279.336	3.82882e-12	6.57137e-10	0.305629	194.071	0.0130424	0.0391713	1	437.005	325.265	700.827	294.515	248.689	498.002	247.305	237.656	204.479	436.054	271.92	352.441	483.505	374.981	343.656	575.728	276.191	441.389	314.675	545.68	324.051	265.176	140.427	283.276	505.506	548.859	350.764	283.547	268.794	391.672	338.087	161.904	154.341	169.785	181.537
ILMN_1715131	CCR7	-1.18921	2200.78	2.96113e-07	4.95042e-06	-0.960019	1164.23	1.1916e-05	0.000105139	0.229188	1731.3	0.230871	0.376271	2	490.285	1227.21	423.469	533.011	666.654	806.58	1014.35	563.561	382.918	1238.64	816.592	443.422	981.246	340.283	519.914	416.042	1232.74	256.321	729.205	1138.5	1982.76	721.28	1547.86	475.586	662.177	393.149	234.709	984.463	478.365	356.029	439.858	1945.58	2195.39	2162.36	2832.95
ILMN_1798256	UPP1	0.777008	926.961	3.16639e-07	5.20087e-06	1.04102	1258	1.62814e-11	2.00289e-09	0.264015	811.893	0.0391609	0.0960403	1	1247.8	1025.49	2633.94	1309.79	1610.77	1822.7	1315.52	1400.37	1146.83	964.994	1102.72	1020.17	2009.47	2800.59	1685.61	2585.98	1871.48	3448.15	2069.65	3529.39	1157.66	1473.09	867.947	1387.2	1642.58	2612.81	1857.68	1167.01	1508.11	1771.12	1160.74	NA	1125.34	719.013	744.748
ILMN_2169152	SRGN	1.11107	3591.01	4.05158e-07	6.37764e-06	1.33986	4090.88	1.08402e-09	5.47982e-08	0.228783	2434.02	0.206853	0.347564	1	4325.9	5078.38	4105.12	3283.12	4815.54	7057.67	3332.18	4392.24	7192.01	6007.74	3972.41	6394.54	5779.12	9248.37	6034.16	2883.32	3729.94	10976.8	7826.82	6843.43	4118.99	5058.06	3144.94	6473.88	7572.74	12781.2	5350.31	3307.55	7379.72	3018.17	3940.43	1994.69	1309.79	2654.16	1962.56
ILMN_1799030	CMTM2	1.06225	600.126	4.75427e-07	7.25314e-06	1.20901	618.706	7.35978e-09	2.50609e-07	0.146766	368.235	0.39907	0.552988	1	350.945	720.156	774.582	464.18	751.041	833.238	363.739	467.32	1762.32	692.268	645.031	678.041	919.555	1346.63	553.183	449.405	764.172	1681.64	902.689	667.296	680.198	628.133	537.039	1752.77	1028.84	2411.84	568.022	605.424	806.09	924.164	677.435	329.279	232.222	383.402	257.493
ILMN_1704870	PGLYRP1	1.37083	1539.88	4.76831e-07	7.26928e-06	1.73997	1056.33	2.6916e-10	1.83712e-08	0.369135	494.479	0.102329	0.205024	1	1405.18	1250.24	2721.46	1158.59	766.01	1489.31	961.129	1176.55	1214.66	1161.67	1191.31	1006.7	3012.64	1717.57	745.629	1712.94	2502.84	4156.34	3546.32	2806.58	852.706	1150.38	674.694	1430.62	1212.58	2937.86	940.584	1533.91	1013.44	1644.59	1538.84	377.848	345.449	200.314	240.816
ILMN_2320330	MAL	-1.02721	625.447	4.77683e-07	7.27706e-06	-0.830314	444.954	1.68238e-05	0.000139971	0.1969	617.853	0.243051	0.389797	2	239.932	428.418	219.303	351.448	226.051	297.113	349.624	164.824	183.659	257.972	265.383	234.159	267.878	152.257	277.828	164.512	337.998	168.52	295.944	361.068	434.514	208.111	411.162	203.667	222.035	198.7	230.767	411.876	794.251	1132.59	225.401	648.003	949.89	790.626	697.251
ILMN_1679185	LEF1	-1.07322	629.026	4.89142e-07	7.42505e-06	-0.927526	793.316	5.0329e-06	5.05714e-05	0.145697	1114.87	0.407894	0.561173	2	400.655	688.26	279.308	393.83	466.603	518.309	685.654	449.235	319.915	936.412	527.33	434.674	706.725	277.531	382.6	277.238	801.406	232.78	601.13	683.465	1023.78	469.902	469.559	233.787	470.102	279.133	191.303	793.758	323.89	257.253	339.84	1062.99	745.959	1509.7	2144.55
ILMN_1707286	FLJ22662	0.902887	1205.36	5.31163e-07	7.92722e-06	1.07733	1953.08	2.14628e-09	9.39858e-08	0.174443	1217.46	0.24155	0.388055	1	1254.82	1905.61	3324.02	2315.64	1829.73	2813.16	1778.42	1528.67	2012.22	2416.52	2158.52	1499.31	4092.53	2416.52	3307.55	2997.43	2399.49	7699.92	3208.09	3972.41	1580.14	1908.1	878.425	1962.56	2749.42	3744.19	3374.11	2049.53	2162.36	2997.43	2690.04	912.294	761.113	964.201	1760.31
ILMN_1696187	PYGL	0.86024	1956.92	6.71314e-07	9.6468e-06	1.17561	1893.22	3.74813e-11	3.69295e-09	0.315365	1098.22	0.0294952	0.0761547	1	2638.87	2319.59	4833.62	1844.45	2232.32	2784.49	2411.84	1681.64	1564.35	2287.14	1762.32	2664.87	3972.41	3656.36	1831.8	2766.99	4168.75	4392.24	2344.34	3422.69	2203.32	1453.17	867.257	1635.98	3382.88	4466.14	2028.24	2484.02	2567.18	2425.49	2728.27	1184.72	582.789	722.542	1276.02
ILMN_3246360	LOC100130553	-1.03433	1722.89	6.82817e-07	9.77908e-06	-0.645346	1799.19	0.000825933	0.00382037	0.388984	2435.63	0.025763	0.0682571	2	755.437	1683.84	894.156	821.493	1868.93	1301.18	1323.17	2103.48	2681.01	1318.32	1175.61	1760.31	1311.39	1073.36	2037.02	620.936	1349.42	1922.4	2585.98	1896.98	1116.91	3158.72	834.218	1841.78	622.473	1324.72	878.425	1790.1	1965	662.177	1215.84	1971.14	3173.13	4278.62	2977.03
ILMN_1753111	NAMPT	0.978819	1951.27	1.01475e-06	1.3608e-05	1.37471	974.002	2.78955e-11	3.00681e-09	0.395891	589.341	0.0187199	0.0527156	1	1614.47	1390.31	1745.97	992.213	1297.28	1794.97	902.052	898.928	719.786	944.264	986.847	1677.59	1734	2082.61	1453.17	1469.49	1400.37	1624.37	1706.64	2140.91	879.737	726.299	557.329	1035.41	1631.97	1876.59	1173.63	1119.39	1268.64	1879.11	1250.24	380.802	326.319	518.105	700.485
ILMN_3248247	LOC100134634	1.14028	1260.75	1.03084e-06	1.37804e-05	1.04135	1401.53	3.31123e-06	3.57532e-05	-0.0989326	869.767	0.608634	0.734878	1	1780.85	3482.53	2456.93	1312.81	850.317	1560.57	944.264	797.888	1103.63	1913.74	1170.51	1428.96	1608.87	2894.71	912.868	1428.96	1560.57	1951.73	1176.55	1922.4	1254.82	908.907	2695.3	4118.99	4021.11	3628.73	1729.44	885.955	1760.31	2912.74	1327.26	485.338	704.303	1032.12	467.674
ILMN_2213136	LEF1	-1.03916	1662.78	1.34056e-06	1.70429e-05	-0.943642	940.86	4.70829e-06	4.7829e-05	0.0955222	1321.67	0.592088	0.720991	2	444.198	892.987	332.849	442.002	542.261	632.199	829.837	486.123	443.892	984.463	661.806	491.357	788.715	277.956	523.383	280.772	910.302	249.61	717.119	844.362	1244.44	557.611	871.082	374.777	587.222	370.288	196.335	868.58	379.188	308.134	389.352	1217.02	886.501	2034.18	2280.17
ILMN_2229922	C12orf35	1.07174	1341.19	1.41908e-06	1.78492e-05	0.744376	1010.23	0.000342747	0.00181813	-0.32736	687.215	0.0782854	0.166634	1	1114.04	1169.22	951.42	888.634	990.072	1622.78	997.216	1405.18	1738.88	1954.12	1135.4	1511.49	1607.3	1852.57	801.406	483.683	1391.62	1111.18	1418.1	895.222	1130.53	1370.69	859.423	999.721	1669.55	1829.73	1236.39	1028.84	1700.52	455.899	1132.59	341.439	206.707	933.592	696.859
ILMN_1809173	LOC729021	1.07499	2305.61	1.44379e-06	1.80959e-05	1.06632	2216.5	8.20203e-07	1.14313e-05	-0.00866712	1391.29	0.962615	0.978124	1	2876.99	4898.34	3686.52	2015.52	1486.55	2484.02	1663.4	1760.31	1736.48	3005.87	1886.92	2195.39	2452.2	4608.3	1661.14	2399.49	2461.42	3500.38	2015.52	3267.17	2046.21	1375.24	4105.12	5632.95	6271.86	5857.48	2819.11	1164.76	3100.98	4538.65	2127.01	823.109	1196.55	1589.94	810.103
ILMN_3251658	LILRA6	0.886282	1597.43	1.95753e-06	2.32739e-05	1.16384	916.201	7.28592e-10	4.04854e-08	0.277558	543.483	0.0755162	0.161979	1	818.763	1073.36	2232.32	1016.03	833.238	961.96	724.652	924.888	606.55	1229.29	662.177	1005.17	956.749	2069.65	1250.24	2079.59	1211.45	2749.42	1413	2123.84	649.874	905.95	703.063	842.064	1454.72	2386.67	1790.1	1105.59	631.508	2006.75	879.737	486.615	483.505	354.82	596.809
ILMN_1773390	LOC641996	1.02457	1533.86	2.38022e-06	2.72623e-05	0.888436	431.672	1.8184e-05	0.000149476	-0.136137	286.648	0.451593	0.601804	1	555.852	1067.49	668.317	529.726	281.796	468.889	252.928	226.756	377.492	426.548	359.937	386.26	452.214	755.437	259.207	407.741	472.184	577.932	376.809	386.382	415.404	291.901	872.179	1614.47	977.636	996.328	517.897	275.181	583.094	1068.43	350.085	197.984	218.252	273.903	167.363
ILMN_1678939	VNN2	1.18847	1824.15	2.45456e-06	2.78751e-05	1.28315	2933.1	1.63444e-07	3.10296e-06	0.0946742	1623.44	0.655961	0.770756	1	4021.11	2858.32	3596.97	2018.29	2789.47	4574.27	1865.95	2187.48	5614.4	5705.06	2469.68	3697.01	5292.89	4231.34	3520.03	2607.42	4438.09	9695.62	4524.18	6301.48	2416.52	4833.62	1243.26	3566.66	4538.65	8732.21	5024.32	3392.13	4592.78	1868.93	3686.52	NA	560.739	1433.69	1225.1
ILMN_1896455		0.739732	337.973	2.57769e-06	2.90102e-05	1.09599	302.502	2.03833e-11	2.39667e-09	0.356255	221.547	0.00770651	0.0254003	1	265.758	229.67	473.753	598.869	222.653	555.852	306.043	294.91	211.272	323.236	340.015	345.903	430.18	402.931	407.444	925.664	329.279	316.826	375.644	413.607	225.32	306.814	322.558	268.739	776.576	351.253	695.694	409.43	268.678	469.021	321.231	208.528	200.779	161.988	206.059
ILMN_1679826	CST7	1.18188	1118.59	2.64127e-06	2.96318e-05	0.977696	1953.3	4.33469e-05	0.000312397	-0.204182	1036.64	0.330738	0.485902	1	2276.01	2411.84	5172.48	1497.9	1778.42	1893.61	866.15	2043.14	2386.67	927.704	2039.92	1622.78	2109.85	3994.7	2552.69	3365.05	1042.77	7747.77	3316.32	5213.62	1547.86	1822.7	2624.02	3257.45	2360.53	9999.8	1825.11	1158.59	2283.46	2690.04	1865.95	999.721	991.526	1398.81	343.392
ILMN_3241462	LOC730754	-1.01812	1356.33	2.83835e-06	3.15435e-05	-0.723437	1532.28	0.000393025	0.00203562	0.294686	2066.64	0.106179	0.21091	2	562.284	1687.72	693.364	387.411	963.548	753.596	1071.42	1663.4	2744.54	1105.59	1132.59	1282.35	991.526	875.263	1986.35	497.09	1205.59	1766.9	2452.2	1381.28	912.868	2429.61	1326.04	2109.85	501.613	1445.23	659.172	1342.11	1602.93	642.905	820.331	1708.82	2382.88	3801.82	2580.96
ILMN_3238001	LOC100132112	1.07327	759.427	3.61596e-06	3.86126e-05	1.07579	896.338	1.71601e-06	2.09404e-05	0.00251662	565.207	0.989602	0.993805	1	1143.62	2307.76	1397.13	812.601	678.041	1101.59	660.515	673.581	634.238	1178.71	730.074	895.753	1177.61	1817.74	552.973	960.404	1105.59	1278.63	734.753	1255.99	895.753	495.104	1790.1	2484.02	2407.8	2217.78	1024.59	599.466	1190.08	1939.68	960.404	304.437	500.994	646.759	288.261
ILMN_1709233	F5	0.824652	397.019	3.72823e-06	3.96721e-05	1.03807	309.753	6.68127e-09	2.31959e-07	0.213417	185.316	0.153478	0.278727	1	317.06	363.846	805.099	311.024	293.112	343.392	281.195	193.402	251.119	263.39	274.551	310.201	505.724	694.812	341.334	721.28	289.978	1406.85	294.258	675.018	265.807	237.656	206.643	338.759	496.918	928.465	368.447	380.329	310.43	545.897	284.829	204.646	184.164	144.404	163.028
ILMN_1674926	C19orf35	0.804436	401.413	3.83949e-06	4.05317e-05	1.24818	365.347	7.93337e-12	1.13018e-09	0.443745	231.301	0.00292245	0.0113001	1	488.542	296.922	1010	565.402	564.609	943.596	362.278	456.075	350.661	438.659	495.288	422.35	838.196	353.49	246.849	930.579	515.846	615.093	350.661	477.044	407.205	325.341	290.962	283.146	890.595	373.34	547.101	488.16	370.615	403.138	750.229	228.077	252.796	149.947	145.514
ILMN_3238203	LOC100132491	1.03052	1187.98	3.96785e-06	4.15774e-05	1.02594	633.284	2.17719e-06	2.5389e-05	-0.0045853	406.155	0.980364	0.988526	1	796.898	1566.48	1036.27	509.808	429.725	684.571	427.792	492.821	452.684	813.604	619.07	621.827	774.048	1308.66	404.263	805.655	656.56	839.231	576.5	900.074	554.228	414.841	1273.45	1528.67	1764.65	1656.68	682.393	386.119	780.486	1276.02	601.13	246.975	333.204	499.357	207.249
ILMN_1800602	GCA	1.11051	1757.65	4.42009e-06	4.55097e-05	1.27492	2883.49	9.80294e-08	2.03538e-06	0.164402	1766.67	0.416345	0.569098	1	3814.23	2937.86	4377.63	2021.62	3048.33	5705.06	2324.48	3248.77	4056.51	4217.84	3055.37	4592.78	4948.47	6418.42	4080.36	2552.69	3018.17	8433.75	4480.53	5292.89	3107.88	3546.32	1438.62	2162.36	4080.36	5292.89	4231.34	2925.54	3520.03	2585.98	3855.38	987.584	413.383	1919.28	2602.84
ILMN_1857413		0.705873	478.175	4.74295e-06	4.81123e-05	1.05542	275.458	4.35957e-11	4.20074e-09	0.349548	199.253	0.00788236	0.0258796	1	263.168	281.983	637.837	286.418	190.817	340.198	331.785	246.118	187.506	430.03	193.916	284.105	557.611	410.522	219.235	614.407	370.718	333.439	254.852	588.933	218.416	254.47	209.839	329.697	695.694	374.878	614.109	276.48	261.627	495.926	279.894	192.06	198.333	177.571	133.614
ILMN_1779252	TRIM22	1.17544	655.304	5.65479e-06	5.57412e-05	0.810636	760.118	0.000745643	0.00349722	-0.364801	539.834	0.0987878	0.199356	3	1021.01	476.318	493.004	1235.39	893.607	1162.66	519.313	593.467	781.407	740.312	1237.47	595.048	555.383	581.487	2478.8	997.976	605.721	770.291	780.948	1276.02	634.803	837.706	1976.55	1350.9	790.626	844.893	2170.74	479.748	895.753	483.124	488.966	NA	260.079	609.104	505.102
ILMN_3249327	LOC100134530	1.03937	1040.38	5.96411e-06	5.83042e-05	1.02032	1163.89	4.39282e-06	4.53165e-05	-0.0190525	733.81	0.920919	0.953182	1	1526.79	2685.81	2024.92	1037.96	847.067	1289.65	798.35	773.621	807.114	1462.85	990.751	1237.47	1449.97	2340.47	779.423	1388.84	1381.28	1710.93	945.632	1741.25	1114.04	737.389	2287.14	2864.47	3005.87	3070.95	1501.27	756.388	1542.49	2407.8	1174.5	425.256	583.692	838.664	349.161
ILMN_1763837	ANPEP	0.863347	1385.67	7.94614e-06	7.46292e-05	1.03443	555.656	7.28116e-08	1.61414e-06	0.17108	350.721	0.292139	0.445056	1	545.014	587.782	1199.89	621.827	558.792	733.902	728.295	397.088	634.486	869.762	614.407	622.14	868.58	1217.02	374.557	1017.67	838.196	874.001	324.698	831.922	699.068	445.574	371.778	559.769	946.402	2088.88	658.894	654.688	771.183	784.402	800.84	215.33	293.596	239.848	252.287
ILMN_1722981	TLR5	0.764393	477.059	8.82688e-06	8.1322e-05	1.11343	378.516	3.14306e-10	2.04834e-08	0.349041	238.435	0.0172767	0.0493933	1	468.183	498.583	980.45	327.712	322.479	612.014	350.085	303.522	221.39	250.634	416.193	348.209	440.598	730.905	615.722	883.397	406.825	905.285	502.392	1040.29	264.053	385.725	254.946	497.66	721.735	875.96	629.909	464.862	471.48	687.594	257.63	216.157	196.335	193.37	253.263
ILMN_1886655		-0.876152	1502.42	9.07004e-06	8.33097e-05	-1.03124	2680.82	1.35455e-07	2.65417e-06	-0.15509	3594.29	0.349807	0.50561	2	2096.23	2738.72	881.709	2133.91	2779.02	980.45	1616.35	2552.69	2252.72	1860.36	1855.21	1797.16	1446.9	902.052	2452.2	693.364	2001.08	621.585	1876.59	1652.71	3034.68	2378.3	5350.31	2195.39	1328.74	1185.78	976.962	2031.06	1270.2	763.792	1905.61	4767.03	4623.96	4833.62	3332.18
ILMN_3183139	LOC100130914	1.16373	2907.63	1.13835e-05	0.000101099	1.11696	2708.5	1.28143e-05	0.000111449	-0.0467633	1612.8	0.833561	0.897629	1	3801.82	7784.66	4407.81	2283.46	1948.84	2918.51	1359.58	1193.43	2272.42	3224.35	2220.73	2681.01	3026.55	6769.17	1704.77	2473.89	2638.87	4311.8	1916.61	3026.55	2984.74	1622.78	5481.39	9427.32	7608	7784.66	2977.03	1079.99	4031.91	6531.28	2403.09	1154.54	1420.77	1973.83	824.238
ILMN_3231621	LOC730235	0.930668	722.742	1.20866e-05	0.000106248	1.054	1010.13	4.8668e-07	7.39295e-06	0.123337	651.803	0.490307	0.635681	1	927.704	1722.32	2004.38	1092.18	503.179	1204.37	761.567	691.905	967.915	1354.97	779.902	1048.89	1286.26	2059.32	607.878	1083.73	1618.6	1642.58	861.355	1167.01	800.407	762.45	1900.16	2690.04	2299.18	2925.54	1584.02	708.549	1620.78	1642.58	928.465	551.647	372.721	486.615	529.946
ILMN_1731714	CREB5	1.03168	677.202	1.66336e-05	0.000138768	1.0438	964.851	7.23258e-06	6.88389e-05	0.0121214	601.462	0.952038	0.971728	1	908.907	1538.84	1458.13	463.656	680.579	1908.1	893.607	1251.38	808.594	1028.84	913.396	1900.16	1428.96	1868.93	1741.25	727.091	1272.28	2158.52	1719.97	1704.77	875.96	927.031	679.128	594.801	1738.88	1893.61	1538.84	1122.51	1815.47	964.201	1212.58	250.998	233.227	691.474	698.339
ILMN_1729801	S100A8	1.33947	2574.82	1.83624e-05	0.000150657	1.87924	4043.4	3.52744e-09	1.41249e-07	0.539764	1805.46	0.0427578	0.103066	1	1919.28	2120.45	5024.32	1644.59	4554.5	3316.32	2291.43	3779.37	6903.83	3656.36	2649.16	5779.12	7308.47	11198.3	14022.5	3677.14	4056.51	24056.3	11928.1	9312.74	3093.99	5309.41	924.888	14165.2	3412.59	18582.7	5039.96	4702.25	8046.34	3448.15	2552.69	872.79	1108.37	2137.79	1419.63
ILMN_3305772	LOC730286	1.00636	1102.4	1.93092e-05	0.000157689	1.10427	1541.63	1.7255e-06	2.10201e-05	0.0979152	956.596	0.621681	0.744605	1	1808.6	3962.96	2838.53	1030.5	1163.77	1665.82	1058.65	1141.45	1207.92	2220.73	1219.33	1356.96	1991.73	3576.14	1045.62	1994.69	1778.42	2507.28	1252.43	2151.92	1464.42	949.205	2649.16	3844.15	4524.18	4118.99	1803.88	908.907	2328.6	2889.37	1629.68	616.315	757.616	1182.64	525.746
ILMN_3183620	LOC100128326	1.141	2310.16	1.96855e-05	0.000159965	1.11972	3169.96	1.5011e-05	0.00012733	-0.0212784	1894.12	0.924677	0.95529	1	4898.34	9189.76	4438.09	2448.62	2469.68	3422.69	1461.32	1465.86	2096.23	3790.21	2224.37	2912.74	4156.34	8004.79	2113.63	2971.57	3136.58	4898.34	2133.91	3756.02	3790.21	1893.61	6769.17	11127.8	8126.54	8630.93	3546.32	1305.06	4623.96	7869.56	3233.29	1430.62	1593.4	2429.61	1115.9
ILMN_1726460	RPL14	-0.863412	2517.39	2.05406e-05	0.000165899	-1.01791	655.32	3.88254e-07	6.15709e-06	-0.154503	840.839	0.366652	0.522583	2	337.843	1060.44	341.536	368.76	234.865	269.739	467.108	480.881	753.085	313.622	548.107	343.925	308.74	356.326	628.133	313.311	462.014	340.472	559.529	403.138	488.966	314.304	939.975	779.902	327.446	422.062	264.053	453.14	304.24	417.969	367.827	739.514	748.59	1535.64	1178.71
ILMN_1784884	LILRB3	0.611755	3065.33	2.173e-05	0.000173553	1.02847	5424.41	1.33879e-11	1.7164e-09	0.416712	3802.56	0.000897631	0.00409944	1	6007.74	6333.98	10976.8	5438.37	5756.3	8935.19	5438.37	5039.96	5024.32	7958.82	6843.43	6872.26	8521.23	8993.62	5039.96	10832.1	7090.81	12425	4985.64	9037.58	5590	4702.25	4118.99	5500.47	8630.93	10667.6	8935.19	4966.83	6246.88	7308.47	7342.54	4067.62	3341.6	2488.68	3844.15
ILMN_3224856	LOC729660	1.12437	2789.92	2.45173e-05	0.000192395	1.02248	3827.27	6.49722e-05	0.000440362	-0.10189	2322.62	0.65036	0.766578	1	5272.15	10585.8	5350.31	2984.74	2966.32	3779.37	1760.31	1764.65	2918.51	4882.44	2932.3	3365.05	5078.38	8935.19	2434.59	4092.53	3844.15	6138.45	2755.09	4966.83	4178.8	2352.61	7267.48	12886.3	9946.66	10452.3	4296.61	1459.67	5903.79	9037.58	4130.75	1780.85	2052.82	2749.42	1220.63
ILMN_3222402	LOC730284	1.05266	2390.59	2.53139e-05	0.000197627	0.869802	1060.67	0.0002607	0.00143618	-0.182858	688.757	0.386601	0.540937	1	1395.87	2824.99	1665.82	959.652	711.358	994.019	626.526	549.756	703.063	1266.27	905.285	1089.19	1358.46	2395.53	651.933	1088.41	863.785	1358.46	776.018	1221.57	1046.47	619.681	2052.82	3307.55	3151.62	2166.6	1239.84	525.746	1435.06	2303.85	998.838	393.83	541.133	762.006	295.589
ILMN_3302350	LOC728728	1.02091	977.785	2.76419e-05	0.000213066	0.903491	982.743	0.000108525	0.0006795	-0.117418	622.258	0.568025	0.701324	1	1431.95	2585.98	1456.57	839.814	694.445	986.159	613.286	552.387	664.914	1131.67	777.473	1034.51	1243.26	2179	571.803	973.108	1156.59	1376.74	680.579	1207.92	982.87	574.097	1994.69	3208.09	2580.96	2220.73	1099.55	666.339	1501.27	2096.23	943.596	380.58	493.373	658.567	253.505
ILMN_2364022	SLC16A3	0.627116	1880.53	3.07008e-05	0.000233682	1.10293	2537.96	5.48073e-12	8.70454e-10	0.475813	1757.27	0.000315913	0.00169994	1	2649.16	2369.92	5500.47	2960.39	2728.27	4931.8	2773.54	2612.81	2425.49	3241.53	2021.62	2421.11	3892.49	4592.78	3100.98	5677.92	2819.11	5756.3	2552.69	3707.69	2824.99	2244.55	1677.59	2502.84	5058.06	4767.03	4882.44	2214.4	3241.53	3040.64	2971.57	2390.87	1780.85	1222.71	1591.8
ILMN_1750974	S100A9	0.711694	3903.06	3.38446e-05	0.000253427	1.12693	7001.44	2.58052e-10	1.78888e-08	0.415239	4724.76	0.00515649	0.0182511	1	5927.49	7028.61	11832.3	5927.49	6995.95	10322.8	6034.16	6656.77	7057.67	6034.16	7122.96	8732.21	13361.9	14747.2	12544.6	10667.6	10452.3	21384.8	12027.5	13126.6	5523.53	6843.43	3114.94	8243.02	7342.54	15723.5	11198.3	9037.58	7154.5	13126.6	7747.77	4042.88	4031.91	3324.02	6034.16
ILMN_2072598	LOC401357	1.1742	5021.61	4.34852e-05	0.000312864	1.03659	2951.92	0.000166689	0.000979968	-0.137605	1763.87	0.571497	0.704066	1	4554.5	9366.57	4080.36	2303.85	2369.92	2516.74	1206.7	1217.02	1936.43	3509.49	2086.28	2937.86	3456.66	6995.95	1689.81	2659.6	2478.8	4080.36	2109.85	3596.97	3324.02	1773.66	5857.48	10191.8	8784.57	8294.12	3697.01	1118.57	4080.36	7958.82	2766.99	1176.55	1392.81	2434.59	910.916
ILMN_1739428	IFIT2	1.40527	1385.73	4.50512e-05	0.000322171	0.879	1982.89	0.00657889	0.022302	-0.526267	1612.32	0.0736679	0.158765	3	2498.16	1016.78	1069.27	3474.05	1612.83	2711.69	1675.34	982.048	1375.24	2654.16	5677.92	2076.07	2328.6	1476.17	2676.05	4118.99	1431.95	1010	1127.31	2478.8	1419.63	1841.78	3482.53	2883.32	1648.75	1153.47	4438.09	1137.39	1254.82	638.216	1149.28	704.778	306.599	923.581	1005.92
ILMN_1731907	LOC643313	0.781339	702.243	4.95799e-05	0.000350435	1.00599	394.003	1.72486e-07	3.22004e-06	0.224651	280.215	0.170557	0.301629	1	468.492	438.505	964.201	446.214	273.178	525.039	404.003	355.317	199.454	459.208	297.721	424.368	655.91	507.146	309.034	847.067	449.866	268.086	405.153	952.329	278.243	309.93	311.938	504.469	1326.04	490.285	714.754	331.03	314.675	1031.32	354.412	178.19	251.713	250.771	161.439
ILMN_1656934	REPS2	0.66767	492.713	5.7462e-05	0.000395891	1.09738	398.004	2.25927e-10	1.60809e-08	0.429714	265.117	0.00292654	0.0113118	1	492.669	393.83	809.646	387.189	448.928	1153.47	399.381	502.392	419.699	511.592	367.422	545.014	842.064	784.798	344.503	977.636	615.722	564.329	364.51	750.229	454.801	390.076	169.252	310.864	538.327	638.216	509.588	508.283	460.905	379.582	593.739	311.56	245.081	162.188	300.886
ILMN_1722622	CD163	0.879846	416.301	7.01138e-05	0.000469972	1.00528	431.754	3.81116e-06	4.03127e-05	0.125436	259.386	0.504551	0.647867	1	212.5	450.148	1087.52	592.092	742.148	666.654	452.846	419.117	414.841	343.925	491.767	246.388	430.34	800.84	747.72	1945.58	405.269	1659.11	490.442	258.278	400.553	362.979	304.094	984.463	439.402	486.453	1303.68	192.946	357.347	346.579	342.161	254.661	264.397	169.149	277.828
ILMN_1805228	LRG1	0.674648	1547.43	8.8779e-05	0.000572024	1.01381	763.071	8.23491e-09	2.74265e-07	0.339159	503.301	0.0223988	0.0609501	1	674.694	1151.61	2009.47	541.133	743.415	1443.62	638.846	627.804	643.187	678.345	908.907	808.092	1099.55	1484.96	977.636	1849.83	881.157	1610.77	787.791	1501.27	623.727	697.562	684.92	818.173	1509.7	1706.64	751.041	803.041	836.491	1159.61	791.522	515.846	327.87	305.882	380.02
ILMN_1750636	RPS26L	-1.05555	4548.35	0.000111416	0.000694381	-0.690613	1468.74	0.00737033	0.0244819	0.364936	2076.43	0.118913	0.229521	2	518.906	2043.14	580.981	733.465	1155.57	933.04	1324.72	984.463	1750.07	1405.18	751.041	1242.03	1092.18	974.745	2076.07	924.888	1661.14	255.594	1773.66	1629.68	1327.26	2018.29	1346.63	1234.17	415.906	527.1	481.044	295.873	986.847	586.93	1405.18	1986.35	2838.53	3984.76	4130.75
ILMN_2180866	RPS26P11	-1.00174	1735.62	0.000151601	0.000902734	-0.708388	2712.71	0.00469392	0.0169287	0.29335	3720.15	0.195149	0.333132	2	1049.78	3667.74	1252.43	1353.8	2628.92	2076.07	2478.8	2034.18	3173.13	2263.68	1555.29	2252.72	2235.78	1773.66	3928.26	1588.01	3128.69	433.497	3086.27	3173.13	2695.3	3392.13	2103.48	2411.84	719.013	975.511	856.162	580.473	2086.28	1098.61	2591.91	3667.74	4641.1	6656.77	7028.61
ILMN_1785732	TNFAIP6	0.923373	812.68	0.000159631	0.000945514	1.21045	416.667	7.03495e-07	1.0045e-05	0.287078	278.108	0.170841	0.302054	1	468.675	312.852	391.917	984.463	345.449	609.678	397.758	245.974	296.976	455.437	593.467	359.844	378.955	660.202	1055.77	1474.87	595.607	1117.76	546.142	598.549	234.201	550.011	348.99	611.718	710.502	642.245	883.397	271.488	379.916	344.981	333.126	290.638	213.025	146.187	149.587
ILMN_1748915	S100A12	1.11251	712.229	0.000183323	0.00106569	1.45309	665.174	9.48818e-07	1.28617e-05	0.34058	301.973	0.18173	0.316043	1	290.311	391.672	2012.22	321.231	426.816	489.15	330.617	553.701	535.182	707.839	404.526	1243.26	1251.38	2148.26	957.51	855.01	792.292	5500.47	1806.2	1506.43	349.892	564.609	159.231	1023.78	813.604	2267.44	879.163	927.704	875.263	1034.51	395.307	162.942	253.589	186.506	466.603
ILMN_1707695	IFIT1	1.63994	1166.99	0.000191839	0.00110883	0.939835	735.309	0.0251314	0.0669059	-0.700105	572.439	0.0610923	0.136629	3	1181.32	170.881	175.643	1667.76	325.097	574.097	494.525	191.303	233.787	953.807	3048.33	308.66	396.679	252.058	1106.6	1306.35	380.46	310.142	240.326	1206.7	379.188	666.952	2984.74	2034.18	414.434	232.34	1997.78	213.571	248.873	NA	173.832	281.436	195.781	268.312	235.892
ILMN_1762713	C19orf59	1.1061	638.116	0.000196552	0.00113238	1.43251	678.972	1.2704e-06	1.63957e-05	0.326411	266.91	0.200089	0.339468	1	503.179	622.763	1834.34	307.68	259	524.04	332.325	413.483	312.485	254.804	612.376	731.354	788.296	1942.49	967.226	908.429	501.784	6683.64	1311.39	3291.71	242.468	678.345	200.636	715.146	734.387	2690.04	837.706	945.036	890.595	2004.38	472.877	221.929	283.492	222.137	289.349
ILMN_1688580	CAMP	1.15863	498.589	0.000327414	0.00174908	1.22887	506.126	9.05724e-05	0.000581818	0.0702441	271.463	0.799155	0.874452	3	209.527	320.43	898.928	1213.51	304.24	535.182	213.186	1187.93	376.693	281.983	654.688	340.651	535.182	1385.84	413.383	352.996	570.993	3647.32	5116.36	722.974	273.903	394.564	247.473	703.885	278.313	398.139	360.851	465.361	400.174	395.96	248.28	165.238	156.415	134.988	171.706
ILMN_3256742	LOC100129902	-1.01069	1698.96	0.000659349	0.00315757	-0.442833	1736.61	0.112344	0.220279	0.567856	2435.29	0.0281684	0.0734836	2	598.869	1528.67	896.418	534.408	1687.72	1057.68	1026.28	1991.73	3868.3	1037.14	1067.49	1813.32	1370.69	1119.39	3357.74	428.261	1423.93	2195.39	2932.3	2028.24	933.04	3241.53	983.673	3779.37	457.604	2043.14	774.048	2315.64	1860.36	436.209	742.968	1509.7	3790.21	6007.74	3114.94
ILMN_1692223	LCN2	1.11231	641.977	0.000667038	0.0031858	1.10641	528.62	0.000471773	0.00237359	-0.00590527	308.027	0.983228	0.990254	3	314.379	358.182	1431.95	1113.06	357.347	768.452	344.898	1297.28	284.95	215.715	923.581	346.942	292.79	1003.65	407.865	1024.59	487.017	3697.01	3972.41	209.94	317.206	330.698	429.277	751.477	319.915	355.01	473.753	292.79	389.457	875.263	276.416	229.712	197.751	133.504	200.734
ILMN_1701603	ALPL	0.9493	2920.59	0.000691742	0.00328388	1.28932	4999.55	3.73195e-06	3.96919e-05	0.340022	2763.74	0.159871	0.287776	1	7308.47	7572.74	13126.6	3492.31	3637.58	7649.81	3012.64	2819.11	2311.81	3844.15	3086.27	5463.1	7454.27	12886.3	7454.27	12781.2	6246.88	17263.5	5078.38	9752.65	4753.84	3492.31	2065.69	4554.5	7454.27	16290.3	7122.96	6191.67	6656.77	12668.2	3520.03	1445.23	1289.65	1710.93	2272.42
ILMN_1652073	LOC653658	-0.635885	1179.05	0.000997716	0.0044986	-1.04309	1219.11	1.18161e-07	2.37461e-06	-0.407201	1455.04	0.0161877	0.0468525	2	488.752	767.983	586.93	422.625	661.806	509.808	720.913	889.251	1620.78	1014.35	1037.96	858.335	519.487	886.501	960.404	377.723	545.68	916.05	1423.93	898.928	799.329	1446.9	626.205	1226.22	459.736	627.496	512.633	1069.27	961.96	512.633	624.643	1307.51	763.257	1568.26	1131.67
ILMN_1721113	HLA-C	1.13488	1830.55	0.00109781	0.00488273	1.63892	1260.77	2.49812e-06	2.82642e-05	0.504041	838.389	0.0952664	0.193682	1	2324.48	2303.85	1022.82	2469.68	218.321	1191.31	1013.44	1211.45	2055.95	2203.32	221.053	1942.49	1648.75	2695.3	1822.7	3412.59	2031.06	1025.49	1254.82	1137.39	2356.17	1717.57	786.299	1048.89	1464.42	312.938	2232.32	1868.93	1939.68	1406.85	2602.84	1214.66	803.473	513.055	864.97
ILMN_1693192	PI3	-1.32406	945.07	0.00139294	0.00600014	-0.957918	1029.25	0.0153077	0.044719	0.366142	1306.49	0.307255	0.461957	2	412.998	1146.83	1293.49	339.649	1458.13	1117.76	828.39	582.789	256.13	252.368	686.784	1229.29	674.694	3357.74	166.426	1193.43	2291.43	248.817	2531.4	562.039	475.018	327.109	163.472	479.934	421.258	1332.99	565.402	815.653	657.595	277.287	715.146	462.317	613.551	1375.24	1638.36
ILMN_1701789	IFIT3	1.25411	628.919	0.00152908	0.00649926	0.966225	892.023	0.0106392	0.0331318	-0.287882	695.492	0.400466	0.554431	3	1459.67	447.882	370.288	2521.18	598.231	869.762	750.229	297.781	324.61	839.231	3257.45	662.177	487.18	303.72	1508.11	2664.87	660.515	321.749	405.803	1234.17	657.882	920.485	3719.87	1976.55	729.205	390.441	2567.18	409.7	290.036	280.513	343.925	580.473	327.526	310.864	312.024
ILMN_1679357	DEFA1B	1.4761	1667.5	0.00233093	0.00933688	1.01438	1354.86	0.028172	0.0734841	-0.46172	671.681	0.272899	0.424131	3	787.791	816.115	2562.69	3729.94	597.678	2113.63	1150.38	3012.64	660.202	290.572	4021.11	442.779	737.835	1530.42	375.644	2434.59	1023.78	11928.1	16645.2	182.645	520.083	602.659	1496.06	752.266	379.33	329.941	898.287	747.334	778.388	408.726	475.174	251.9	222.653	126.379	210.261
ILMN_1759818	SORL1	0.538783	4611.93	0.00256406	0.0101353	1.10255	1665.45	3.74494e-09	1.47319e-07	0.563772	1173.72	0.000447113	0.00226937	1	2018.29	1808.6	3555.02	1403.6	1956.85	2864.47	1860.36	1771.12	1461.32	3136.58	1729.44	1857.68	3392.13	2990.73	1244.44	4067.62	2055.95	2701.12	1361.23	2055.95	2183.44	1319.36	827.982	1299.91	4118.99	3412.59	2244.55	1712.94	2220.73	1738.88	2235.78	1634.19	1348.16	883.99	851.406
ILMN_1728639	FCGR3B	1.10007	2711.54	0.00431302	0.015785	1.18402	4521.32	0.00156808	0.00664514	0.0839409	2988.7	0.802003	0.876058	1	8004.79	6769.17	8046.34	7747.77	5006.44	6562.57	5093.92	4438.09	5058.06	4392.24	5546.44	4255.49	8346.38	11048.2	4156.34	4898.34	4118.99	8243.02	3422.69	5677.92	5397.23	4850.4	7342.54	183.749	6034.16	8677.74	8521.23	5653	5272.15	2493.42	4850.4	164.512	1618.6	3078.62	3144.94
ILMN_1729749	HERC5	1.10107	2704.21	0.00485011	0.0173684	0.693184	1076.56	0.062819	0.139757	-0.407884	925.709	0.231818	0.377248	3	1436.83	343.293	397.346	2676.05	637.258	956.749	895.753	378.432	370.4	1010	3779.37	524.04	648.633	409.283	1369.07	3656.36	768.963	381.179	387.783	1453.17	691.905	1032.12	3814.23	2062.77	694.038	298.705	2789.47	559.324	394.454	302.842	373.542	652.835	427.477	436.478	505.506
ILMN_2054019	ISG15	1.20417	1784.83	0.00722668	0.0241101	0.551736	738.55	0.195193	0.33318	-0.652438	631.327	0.0974159	0.197129	3	450.313	207.309	169.378	2871.24	323.801	295.315	461.838	185.286	264.1	359.158	2291.43	272.257	388.489	177.512	699.766	2395.53	426.548	152.422	281.796	986.159	282.031	518.309	5417.69	1341	337.091	137.227	1677.59	186.867	207.114	221.751	180.965	348.514	249.883	242.687	242.07
ILMN_1708934	ADM	0.599928	933.498	0.00853895	0.0276642	1.00403	1511.66	1.15285e-05	0.000102229	0.404104	1082.62	0.0446565	0.106748	1	1886.92	1382.98	3200.4	1352.3	1305.06	1834.34	1002.96	1144.64	587.502	1356.96	1130.53	1279.97	2344.34	3492.31	2336.74	5213.62	1626.12	2547.65	1829.73	3275.84	1107.38	1274.81	623.412	890.595	2175.27	3275.84	2498.16	1817.74	1834.34	2633.94	1719.97	797.888	454.801	739.078	1414.57
log2FC, log2 fold change; AveExpr, average expression of log2 (normalized expression); Adj.P.val, adjusted P-value. CC, cervical cancer; CIN1, cervical intraepithelial neoplasia; CTR, control. The normalized expression data are also available
[truncated: 52 more columns]
